# Supplementary figures and images for: Structural characterization of human RPA70N association with DNA damage response proteins
Source: eLife journal article supplement (doi:10.7554/elife.81639), 2023-08-11

Figure 2K  
HeIB

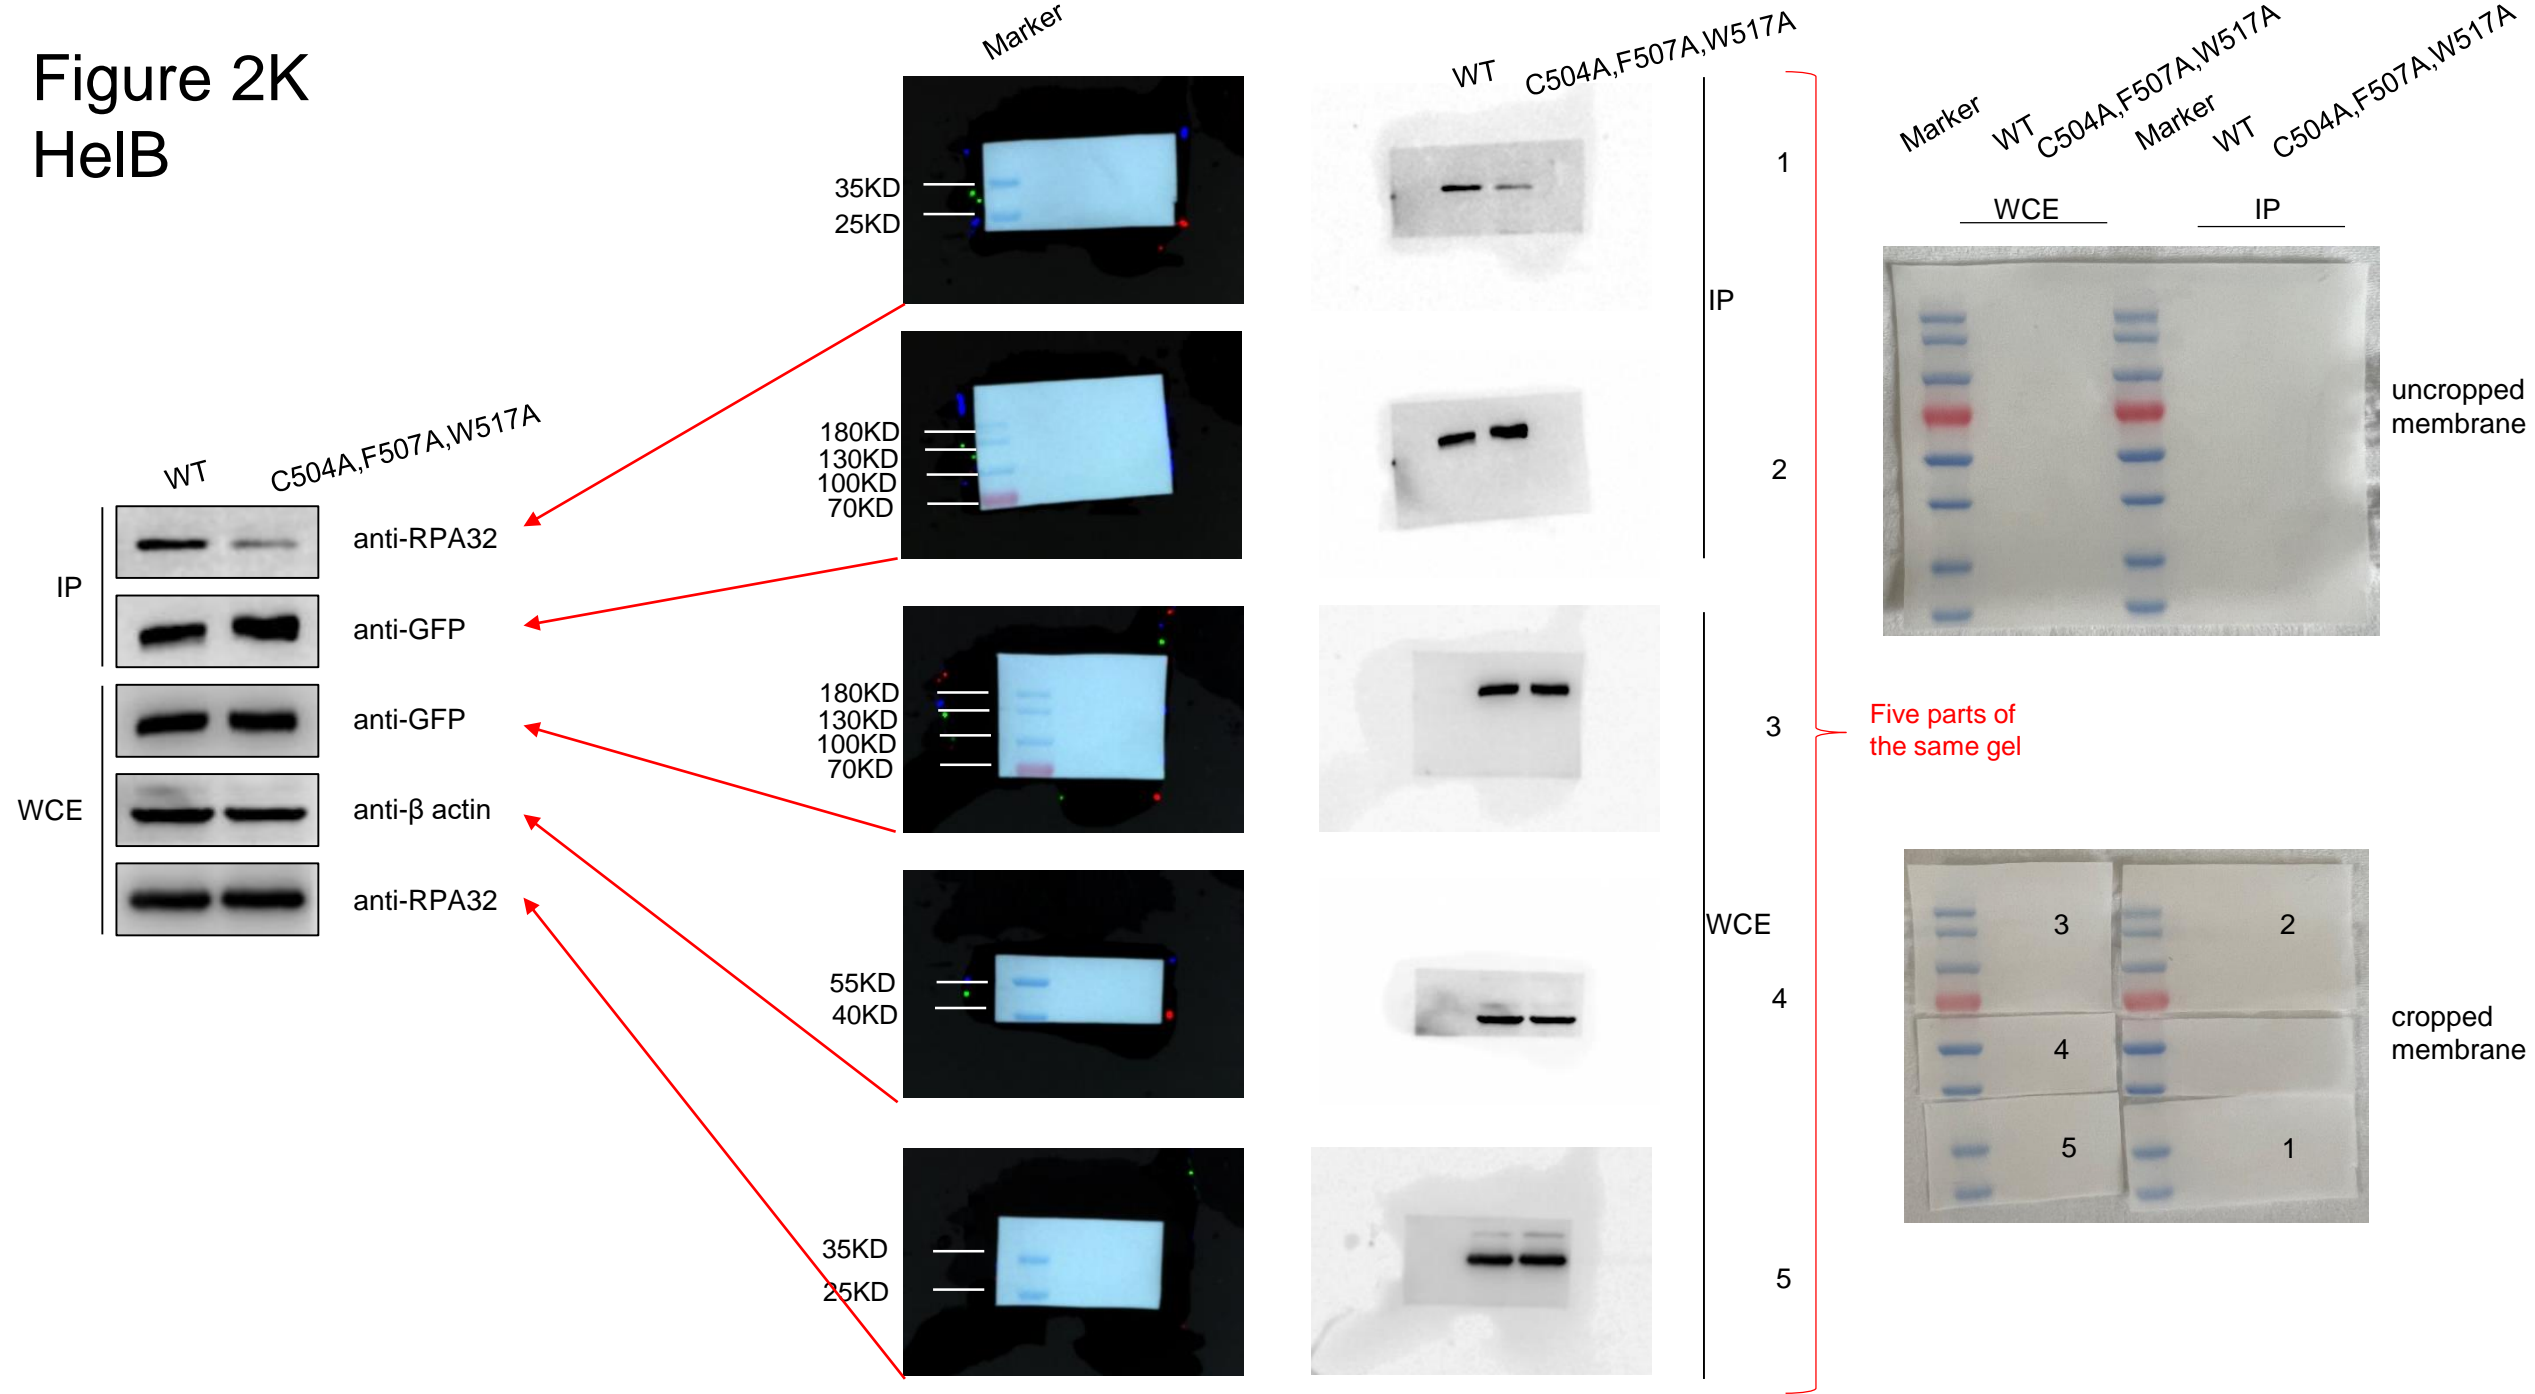

Supplement: fig2-data1 [file Figure 2K.pdf › Figure2-source data/Figure 2K.pdf]

Figure 2K  
HeIB

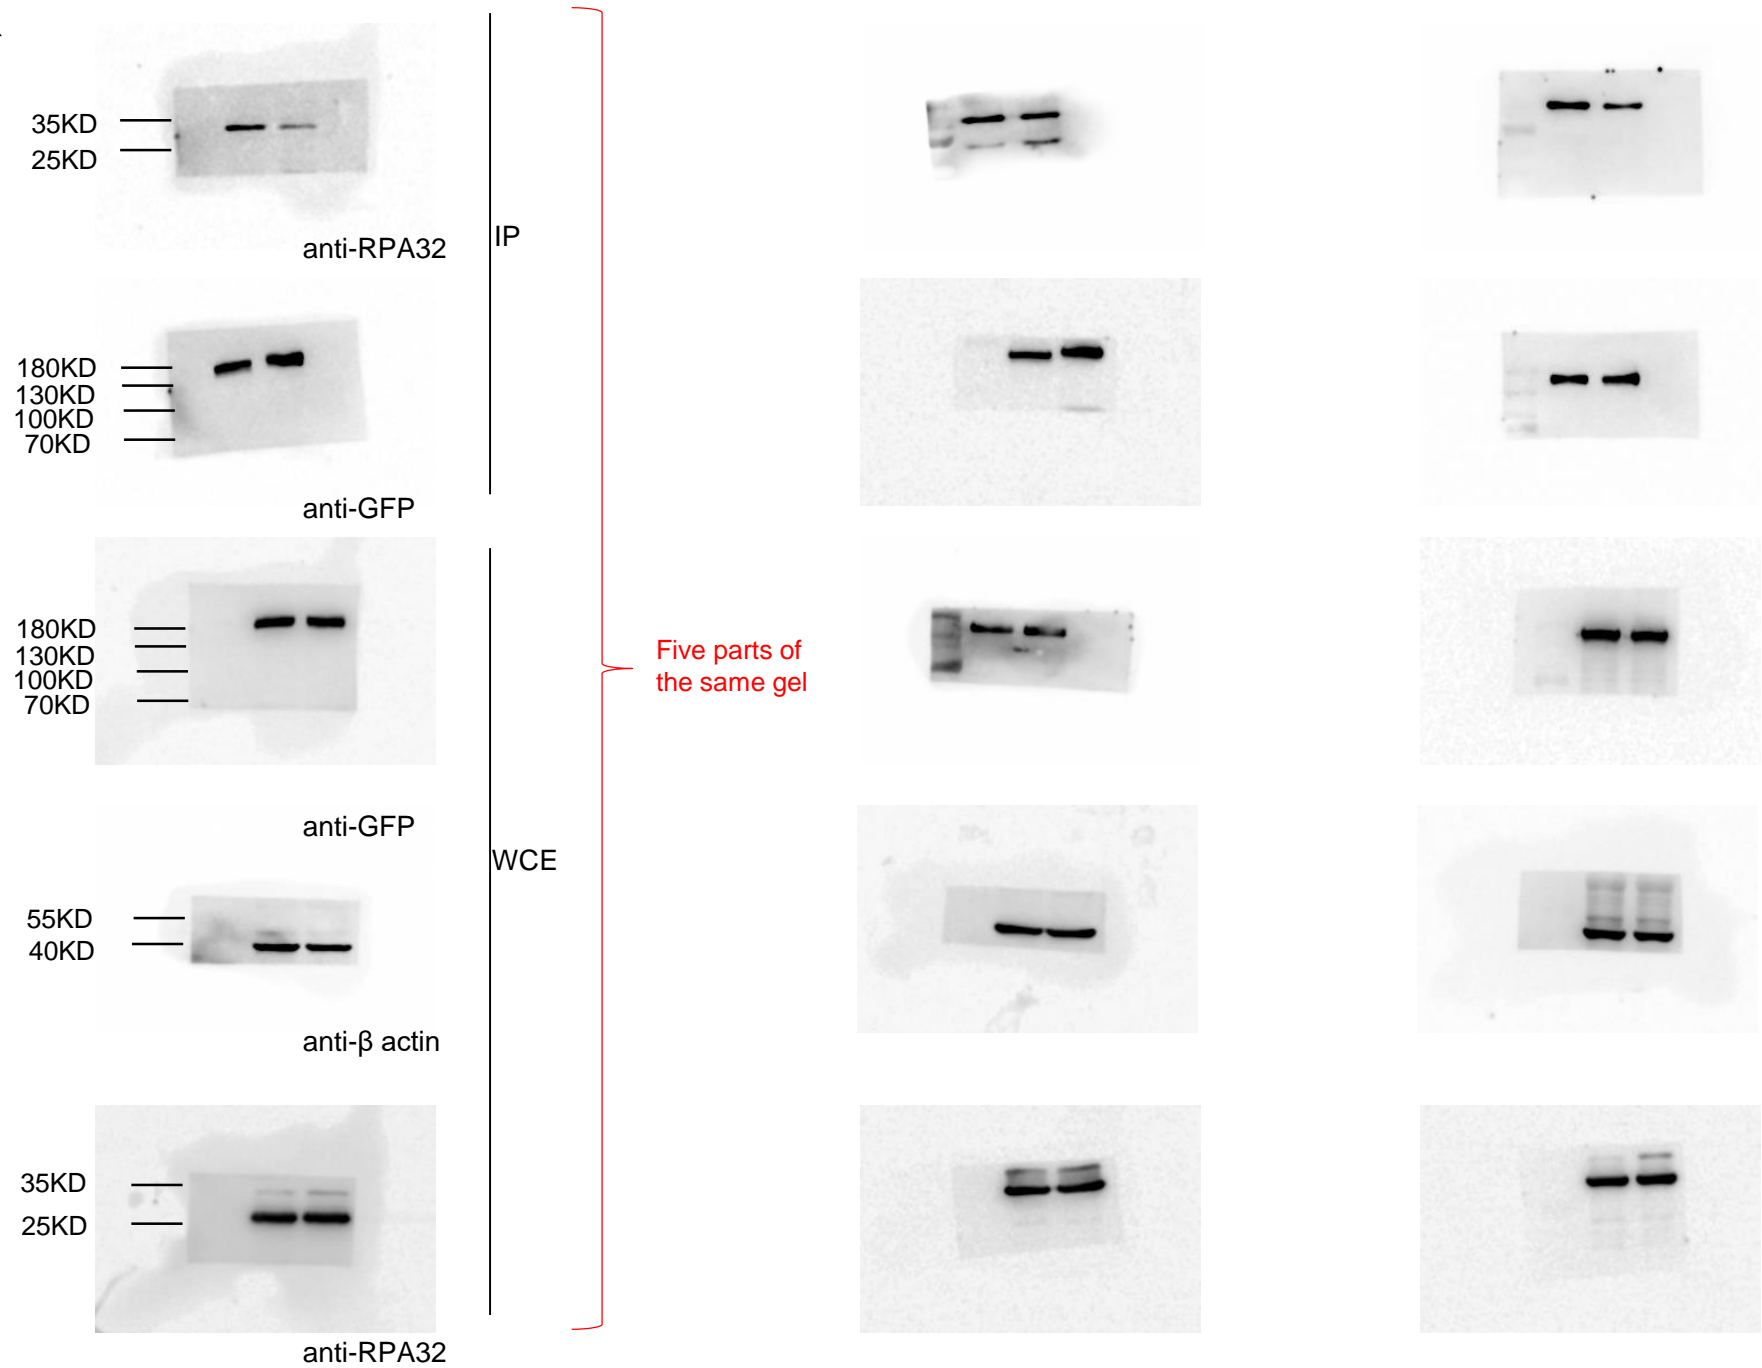

Supplement: fig2-data1 [file IP-data-Figure 2K.pdf › Figure2-source data/IP-data-Figure 2K.pdf]

Figure 3N  
BLM

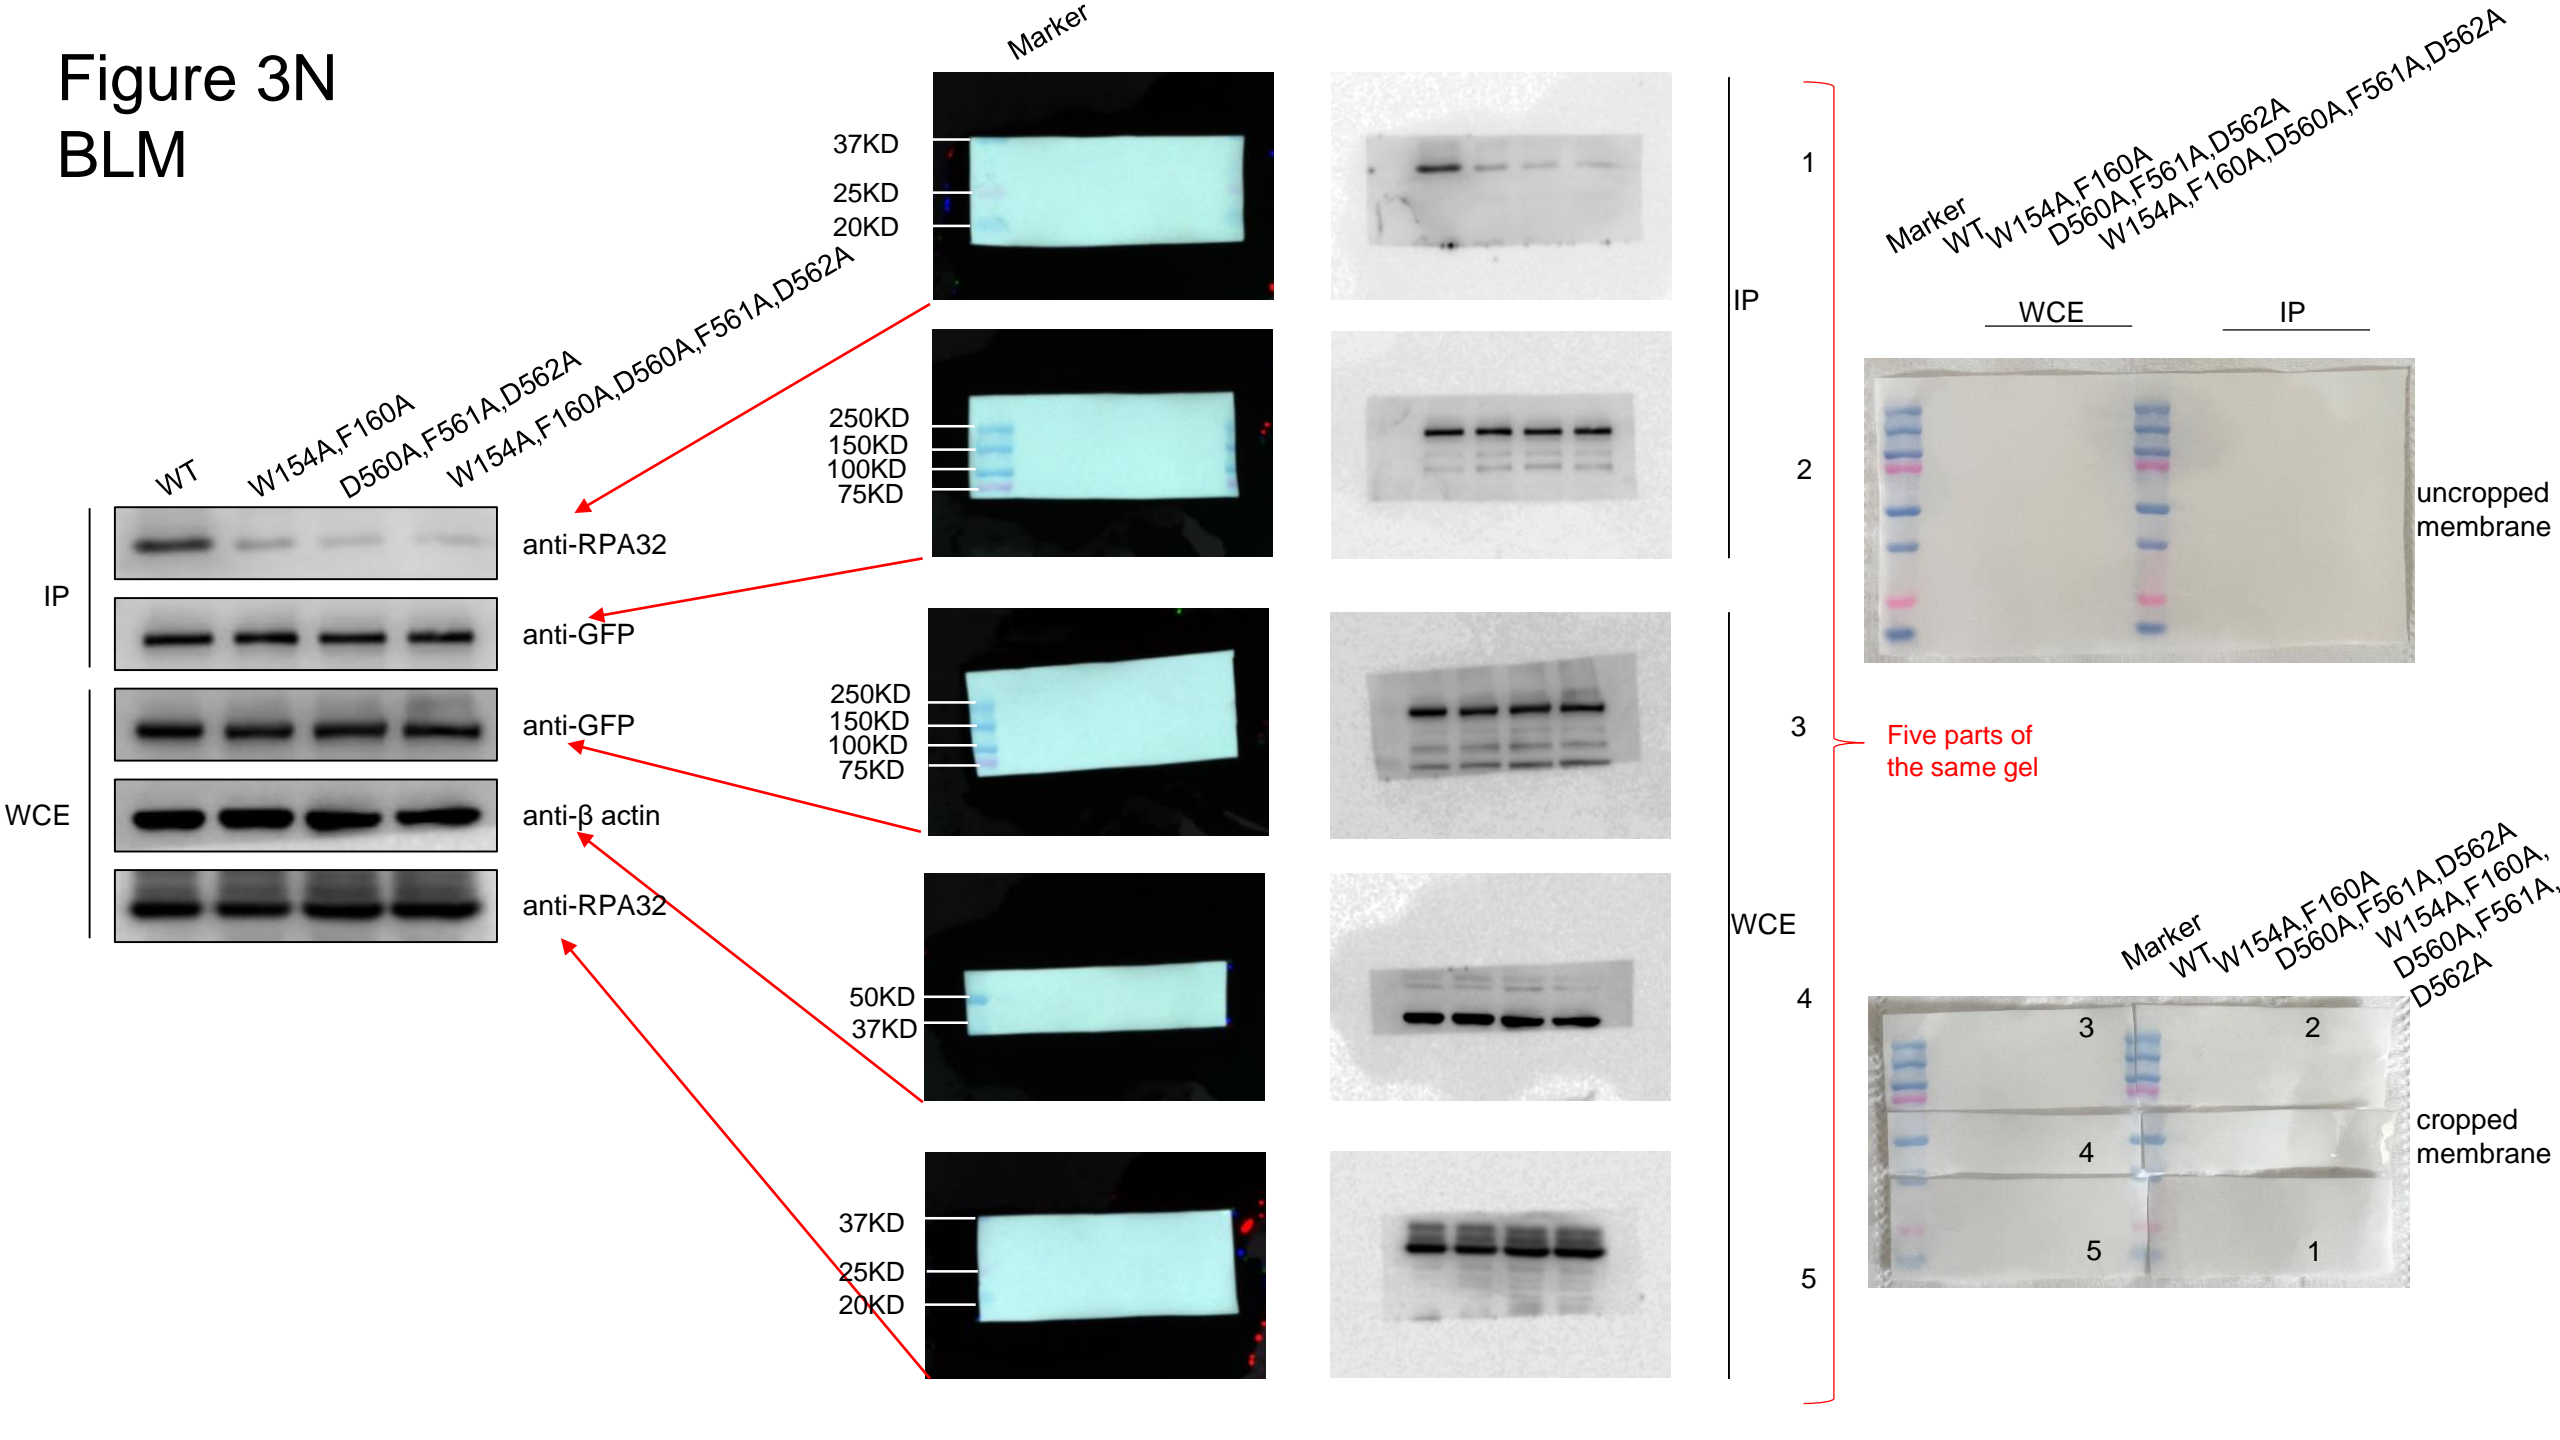

Supplement: fig3-data1 [file Figure 3N.pdf › Figure3-source data/Figure 3N.pdf]

Figure 3N  
BLM

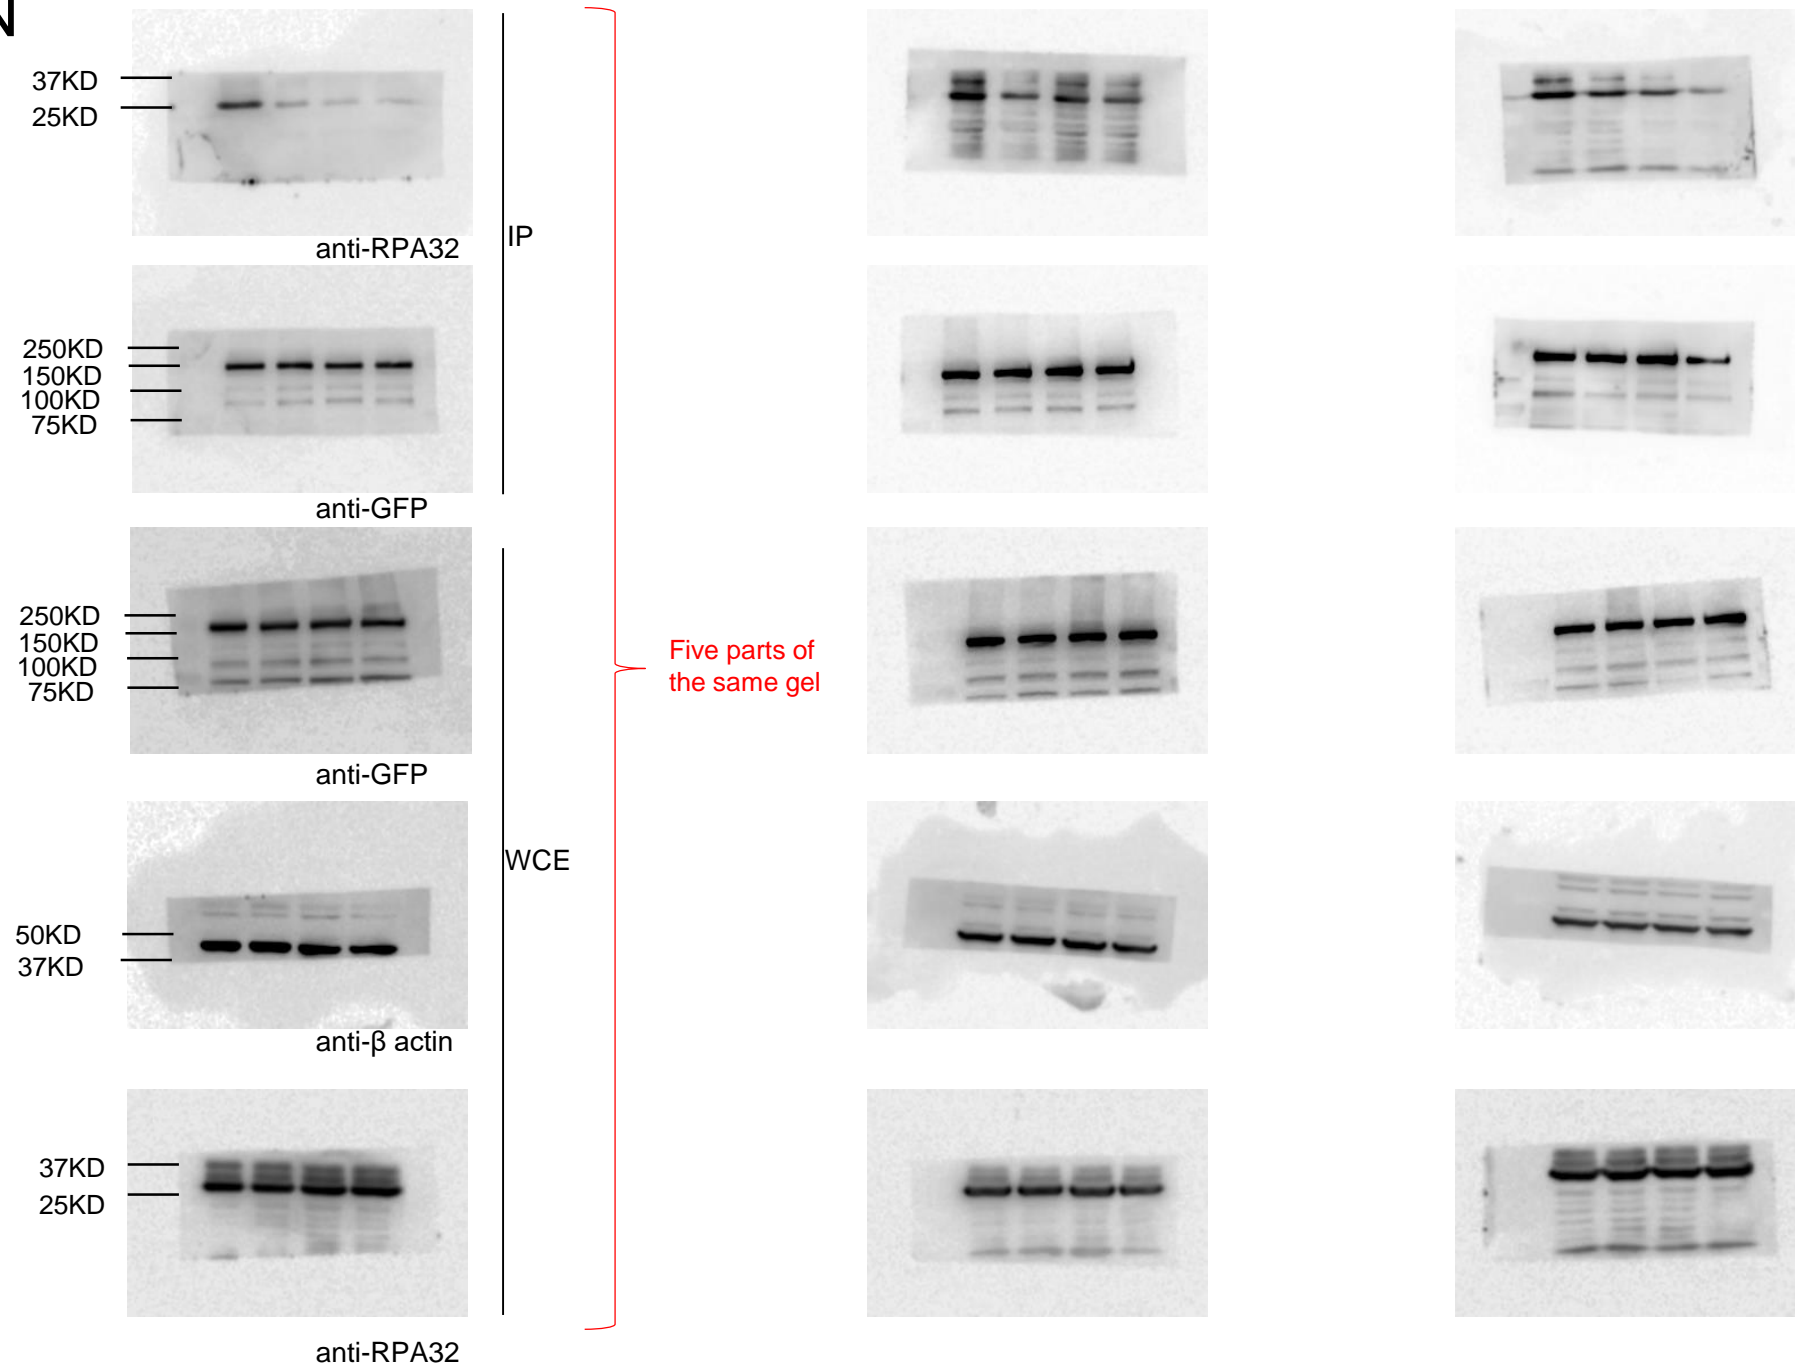

Supplement: fig3-data1 [file IP-data-Figure 3N.pdf › Figure3-source data/IP-data-Figure 3N.pdf]

## G

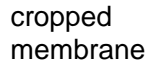

Supplement: fig4-data1 [file Figure 4G.pdf › Figure4-source data/Figure 4G.pdf]

Figure 4G

RMI

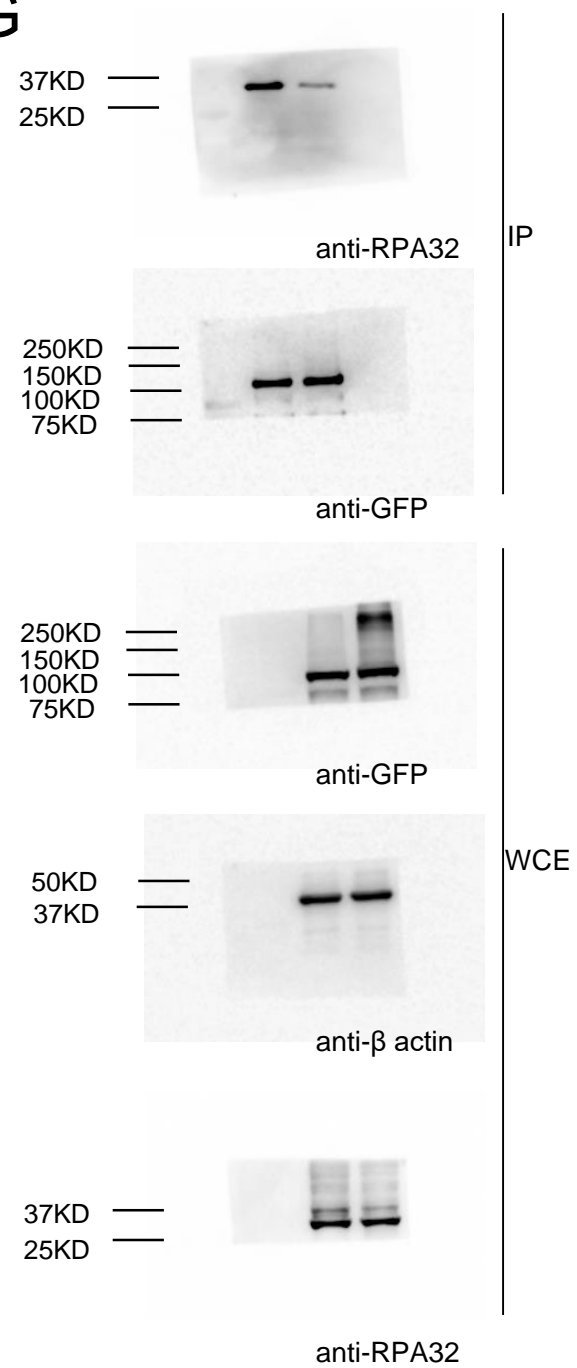

Five parts of  
the same gel

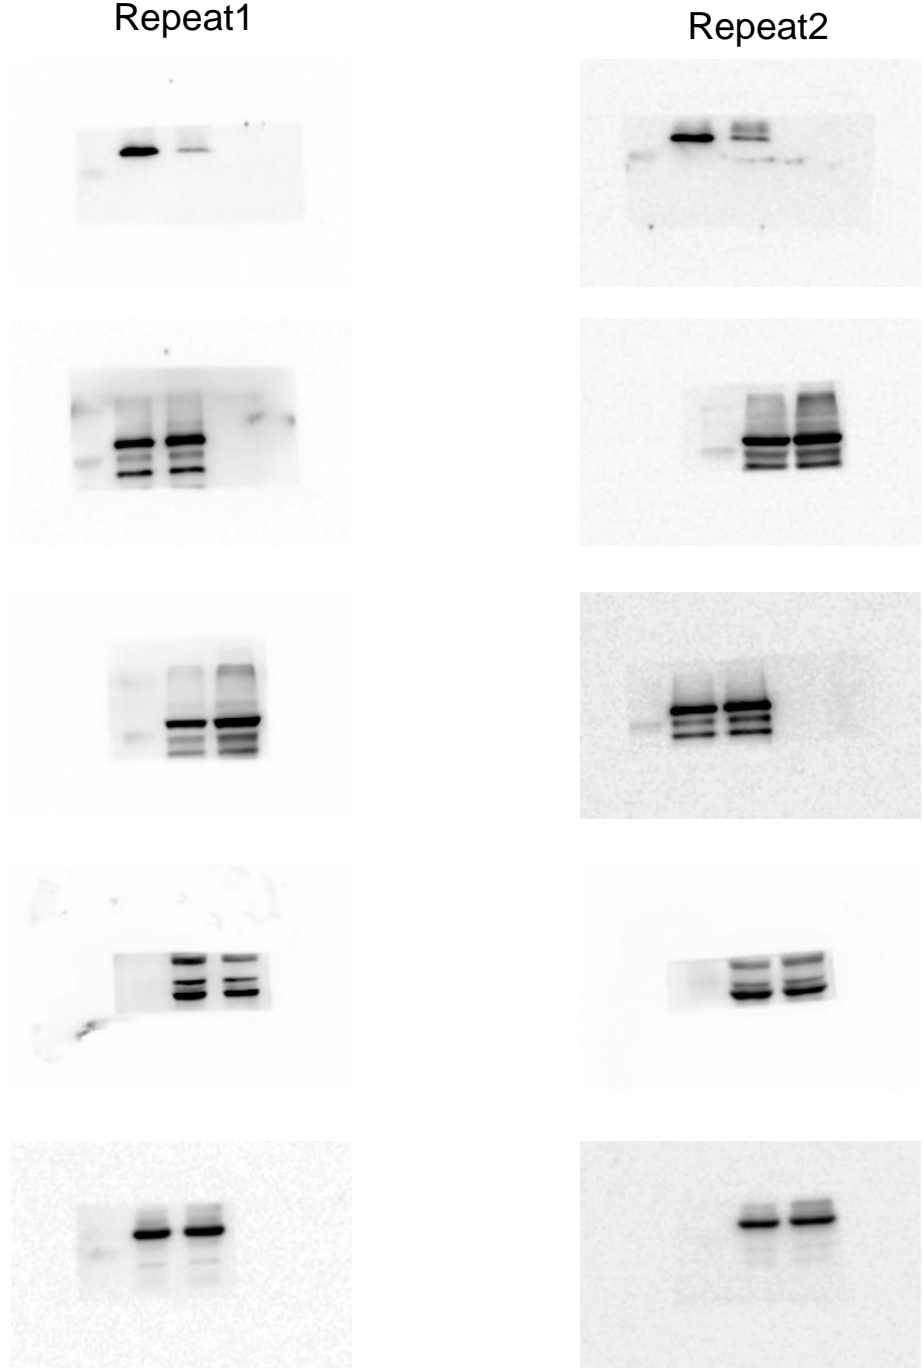

Supplement: fig4-data1 [file IP-data-Figure 4G.pdf › Figure4-source data/IP-data-Figure 4G.pdf]

Figure 5L  
WRN

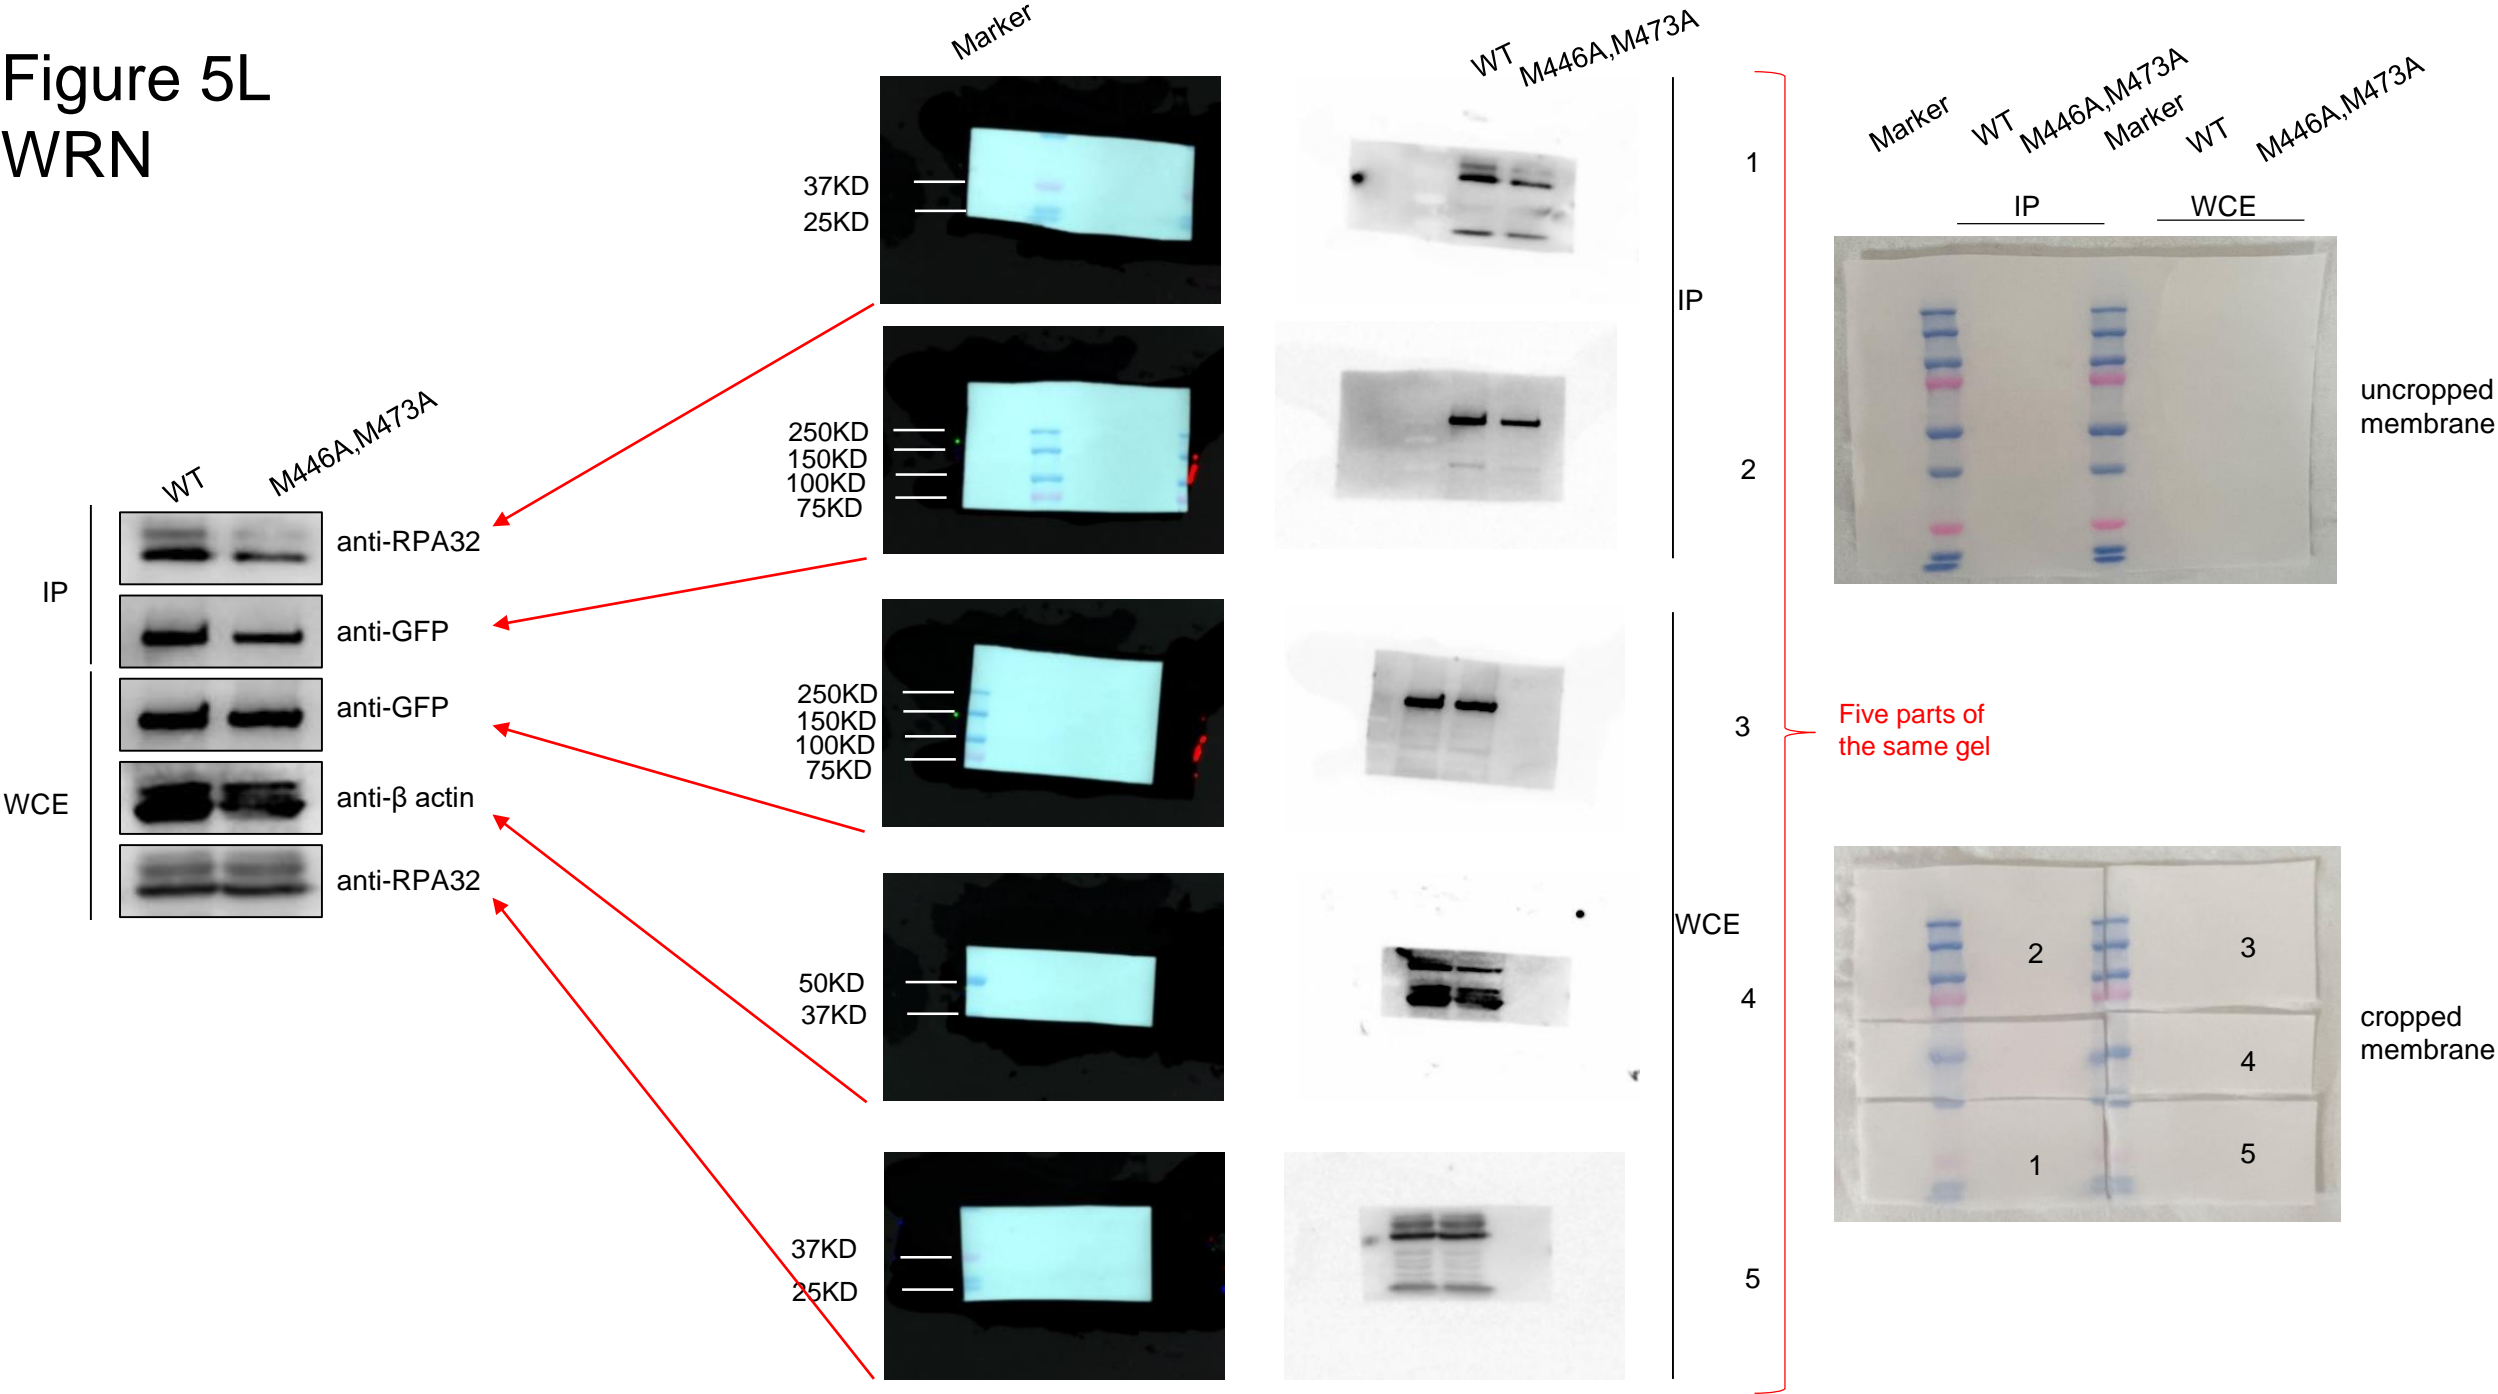

Supplement: fig5-data1 [file Figure 5L.pdf › Figure5-source data/Figure 5L.pdf]

Figure 5L  
WRN

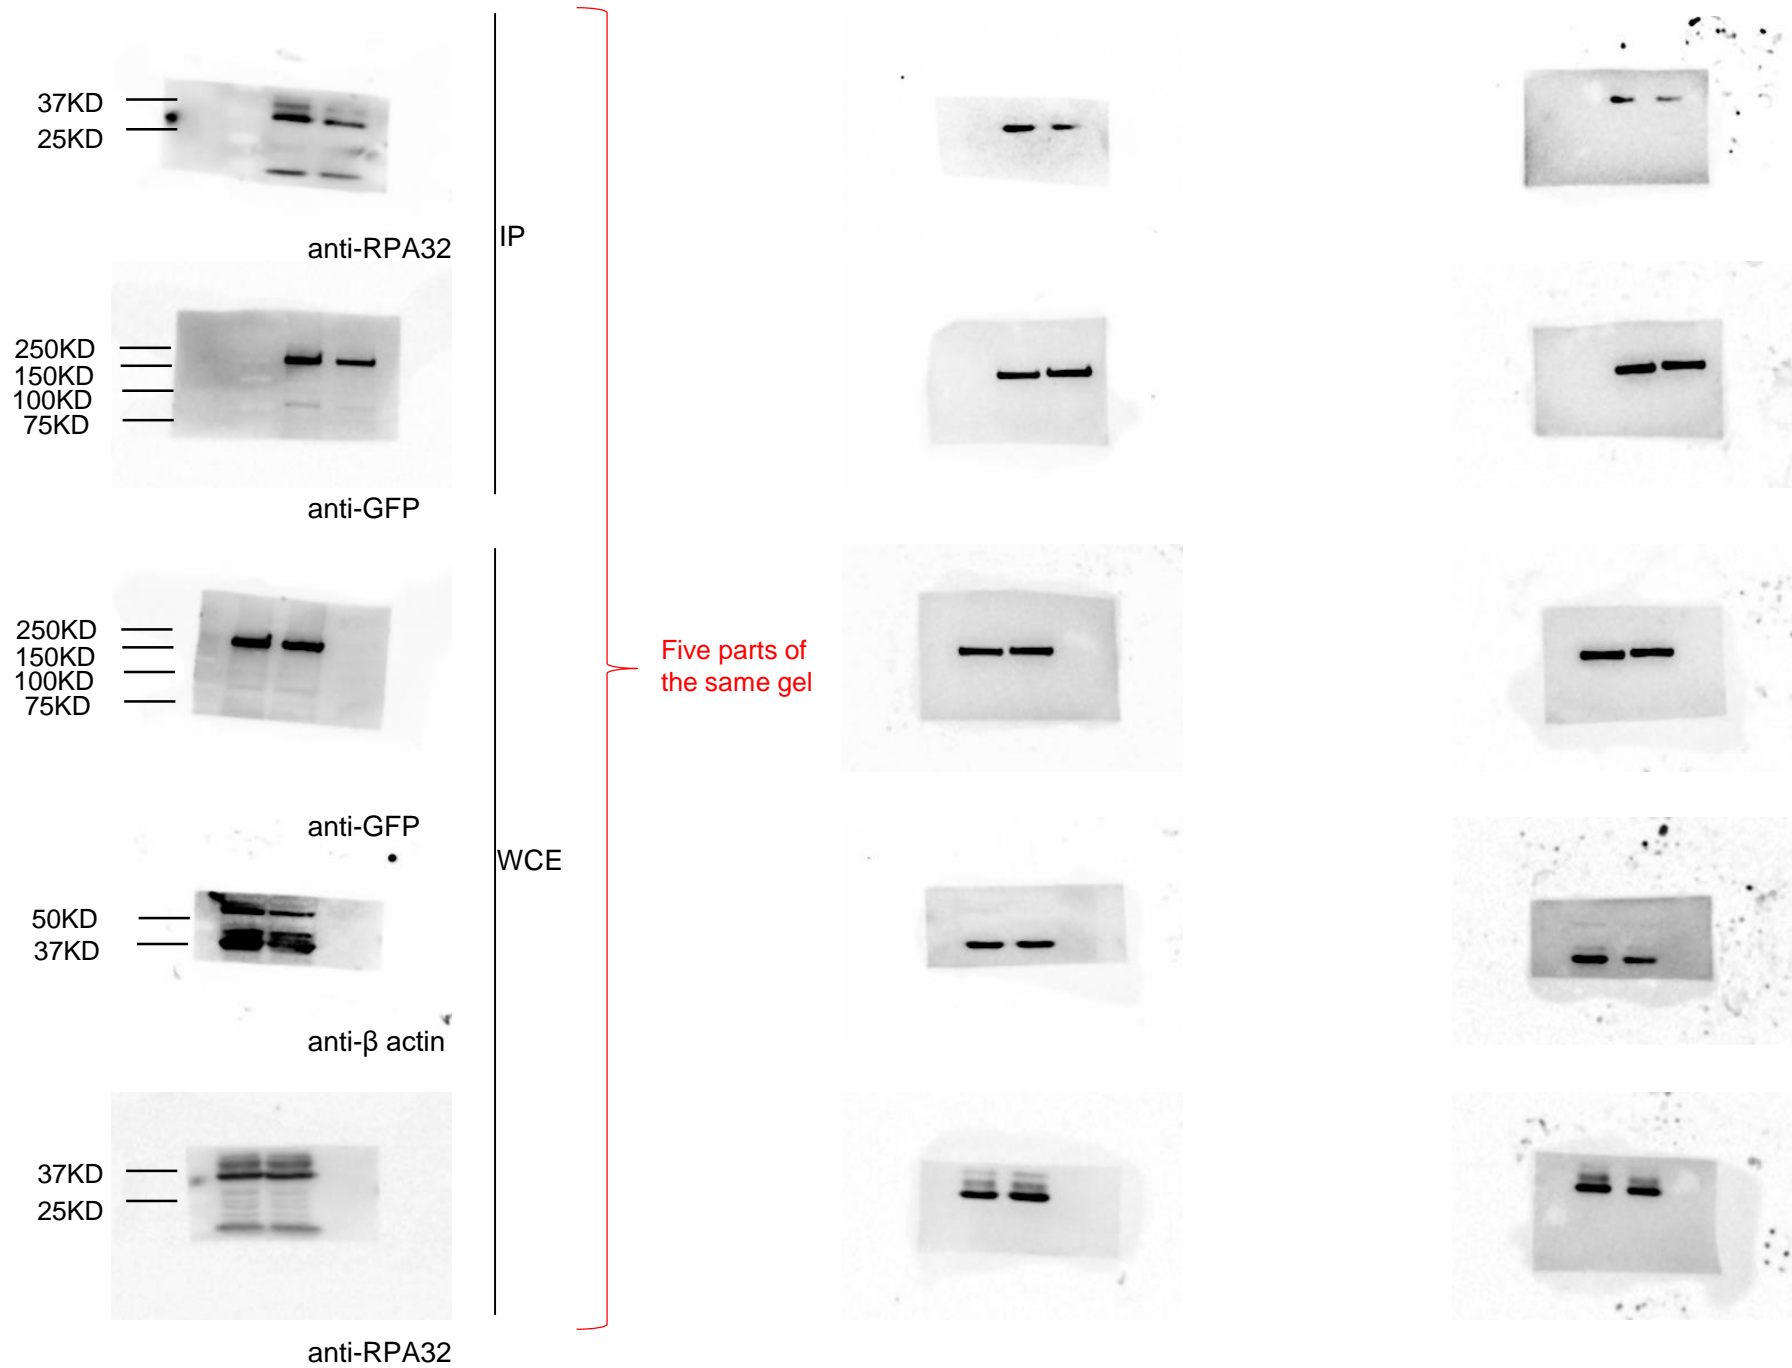

Supplement: fig5-data1 [file IP-data-Figure 5L.pdf › Figure5-source data/IP-data-Figure 5L.pdf]

Figure 6L  
ATRIP

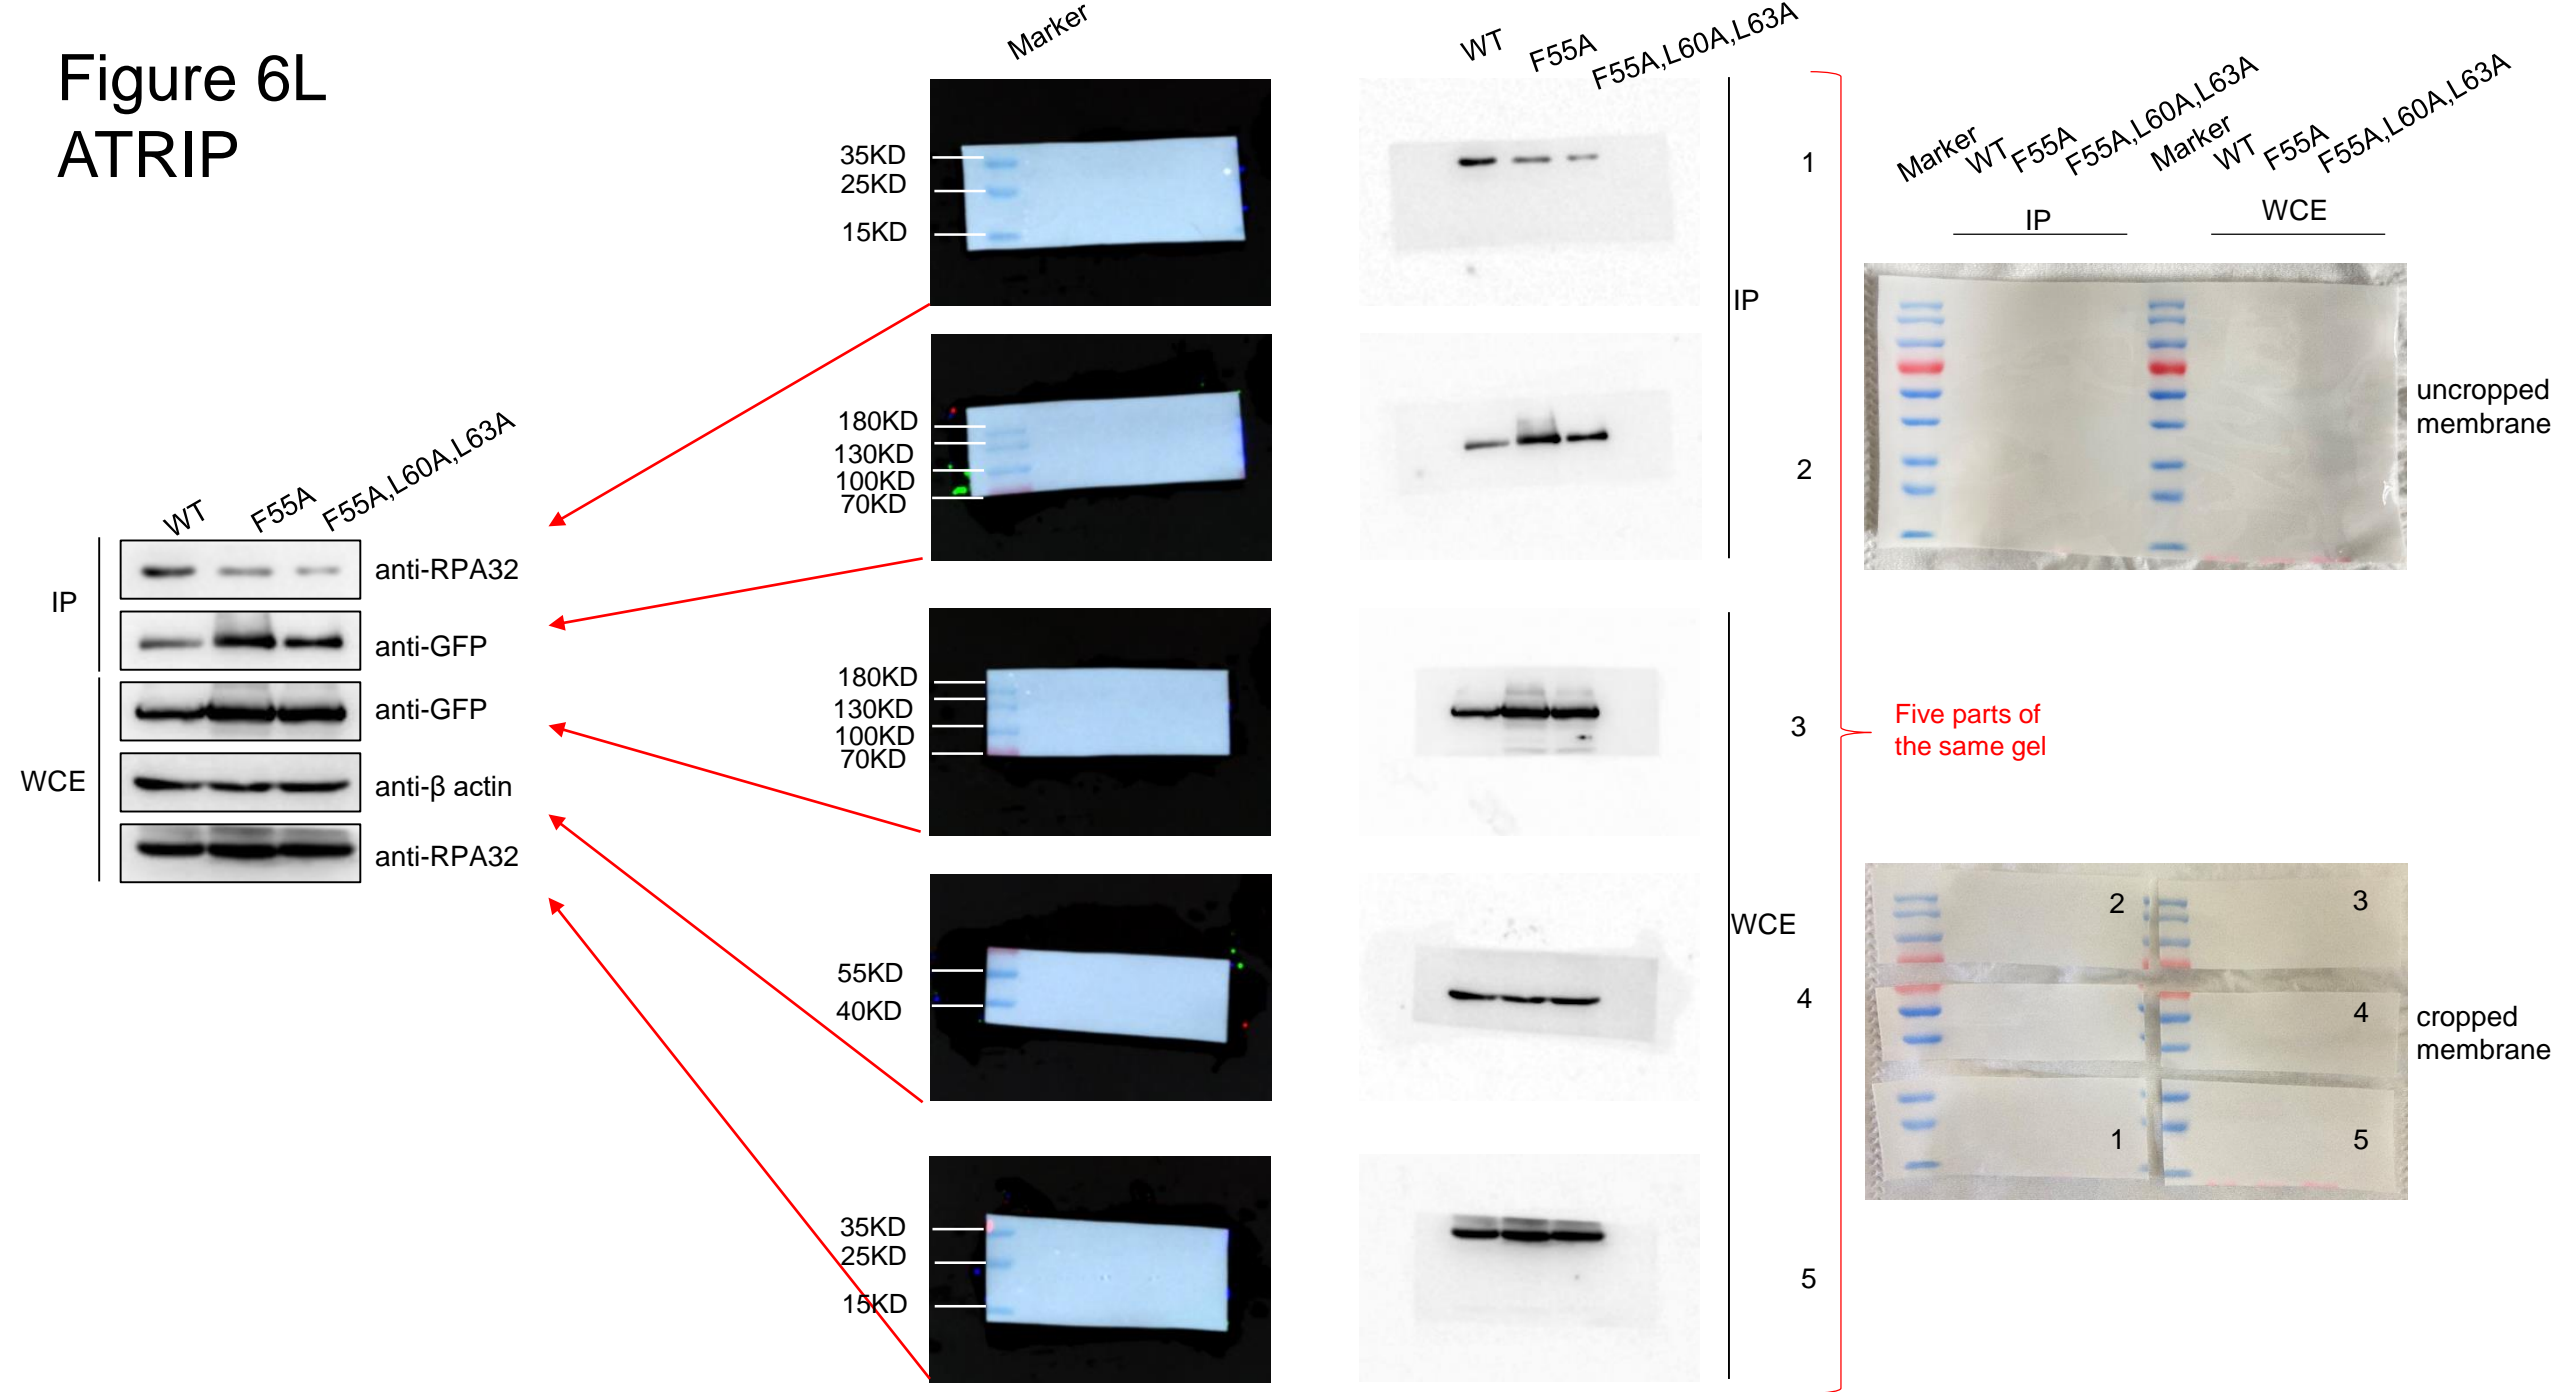

Supplement: fig6-data1 [file Figure 6L.pdf › Figure6-source data/Figure 6L.pdf]

Figure 6L  
ATRIP

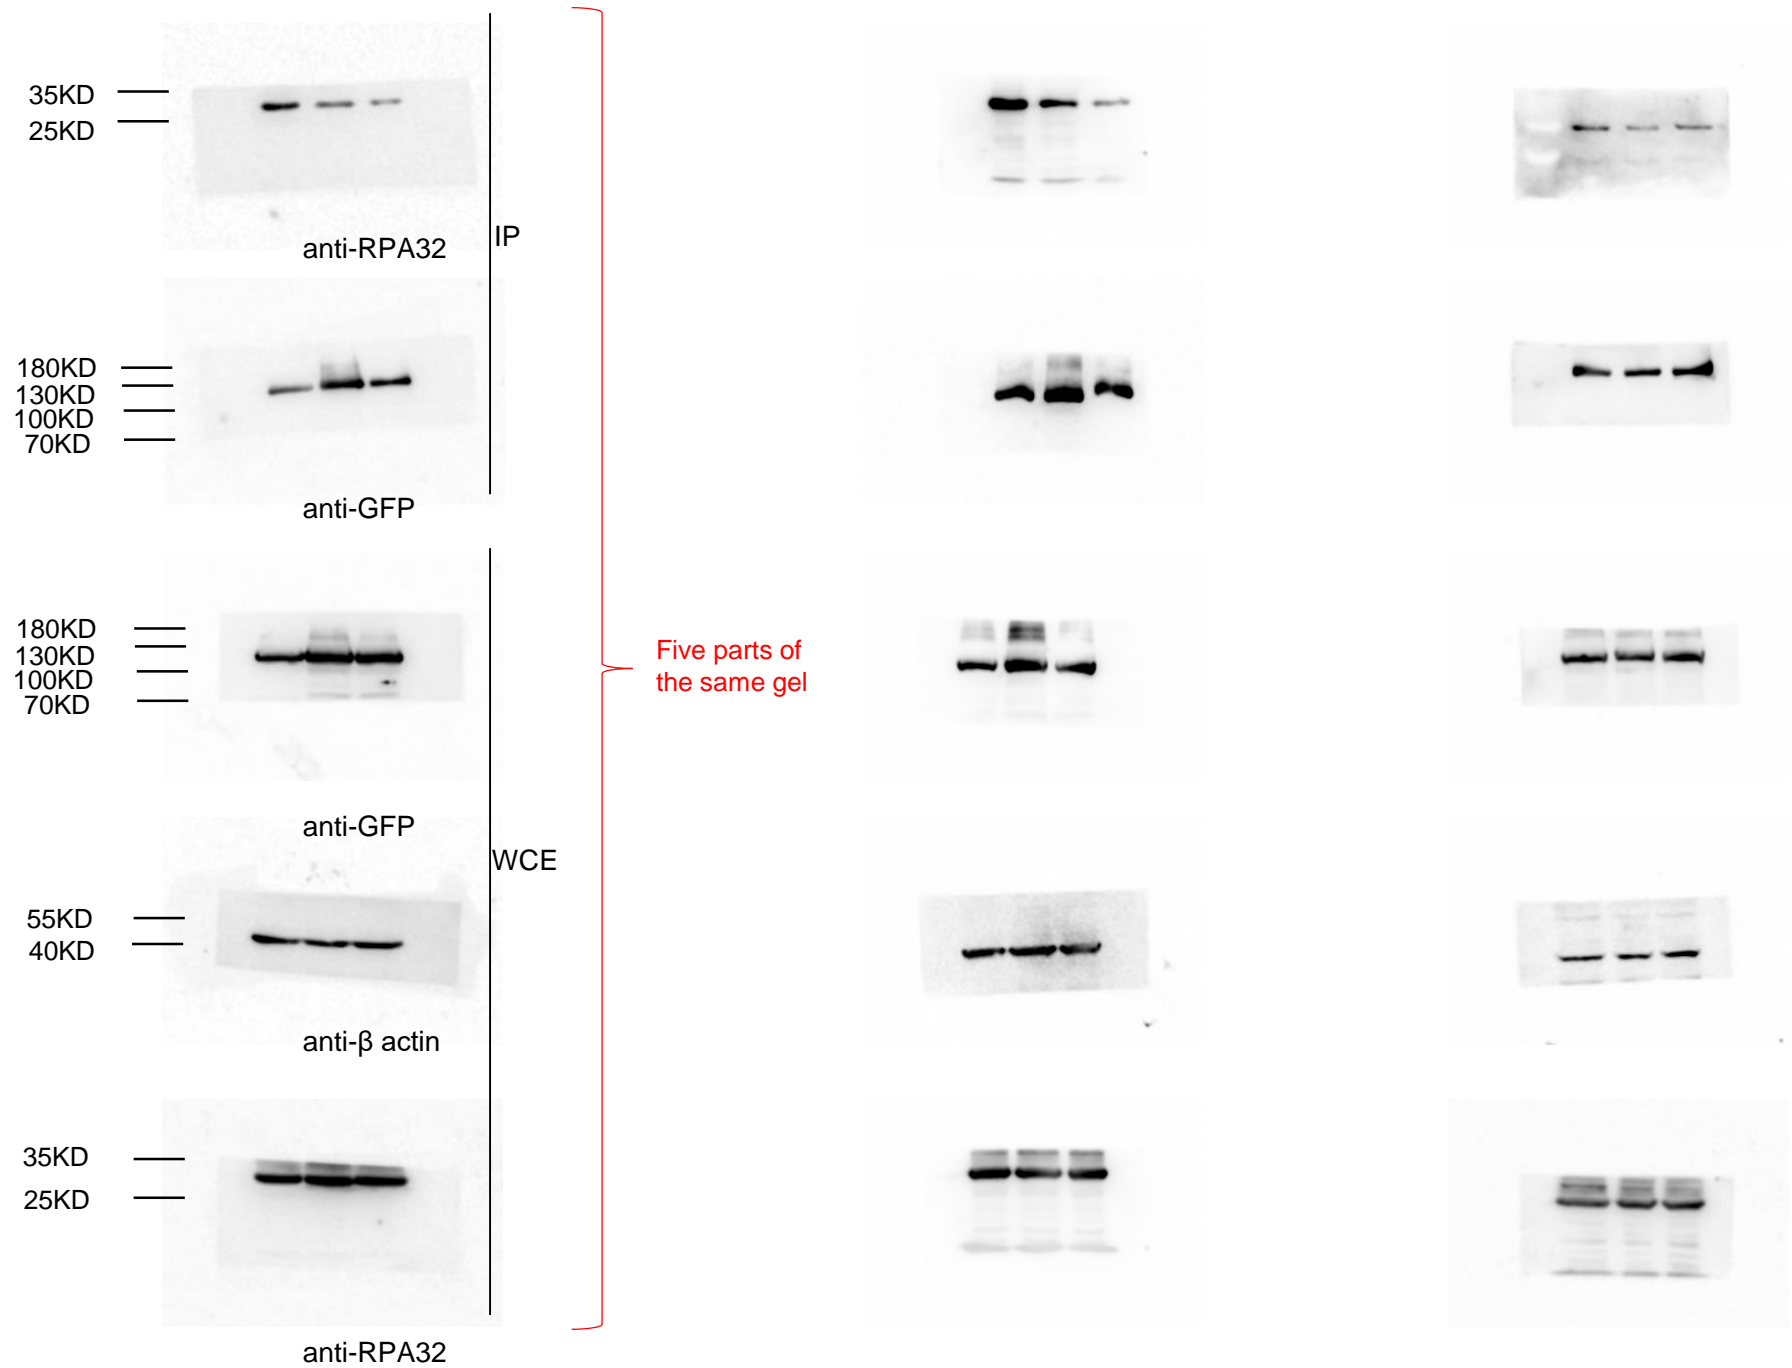

Supplement: fig6-data1 [file IP-data-Figure 6L.pdf › Figure6-source data/IP-data-Figure 6L.pdf]

Figure 7E  
MRE11

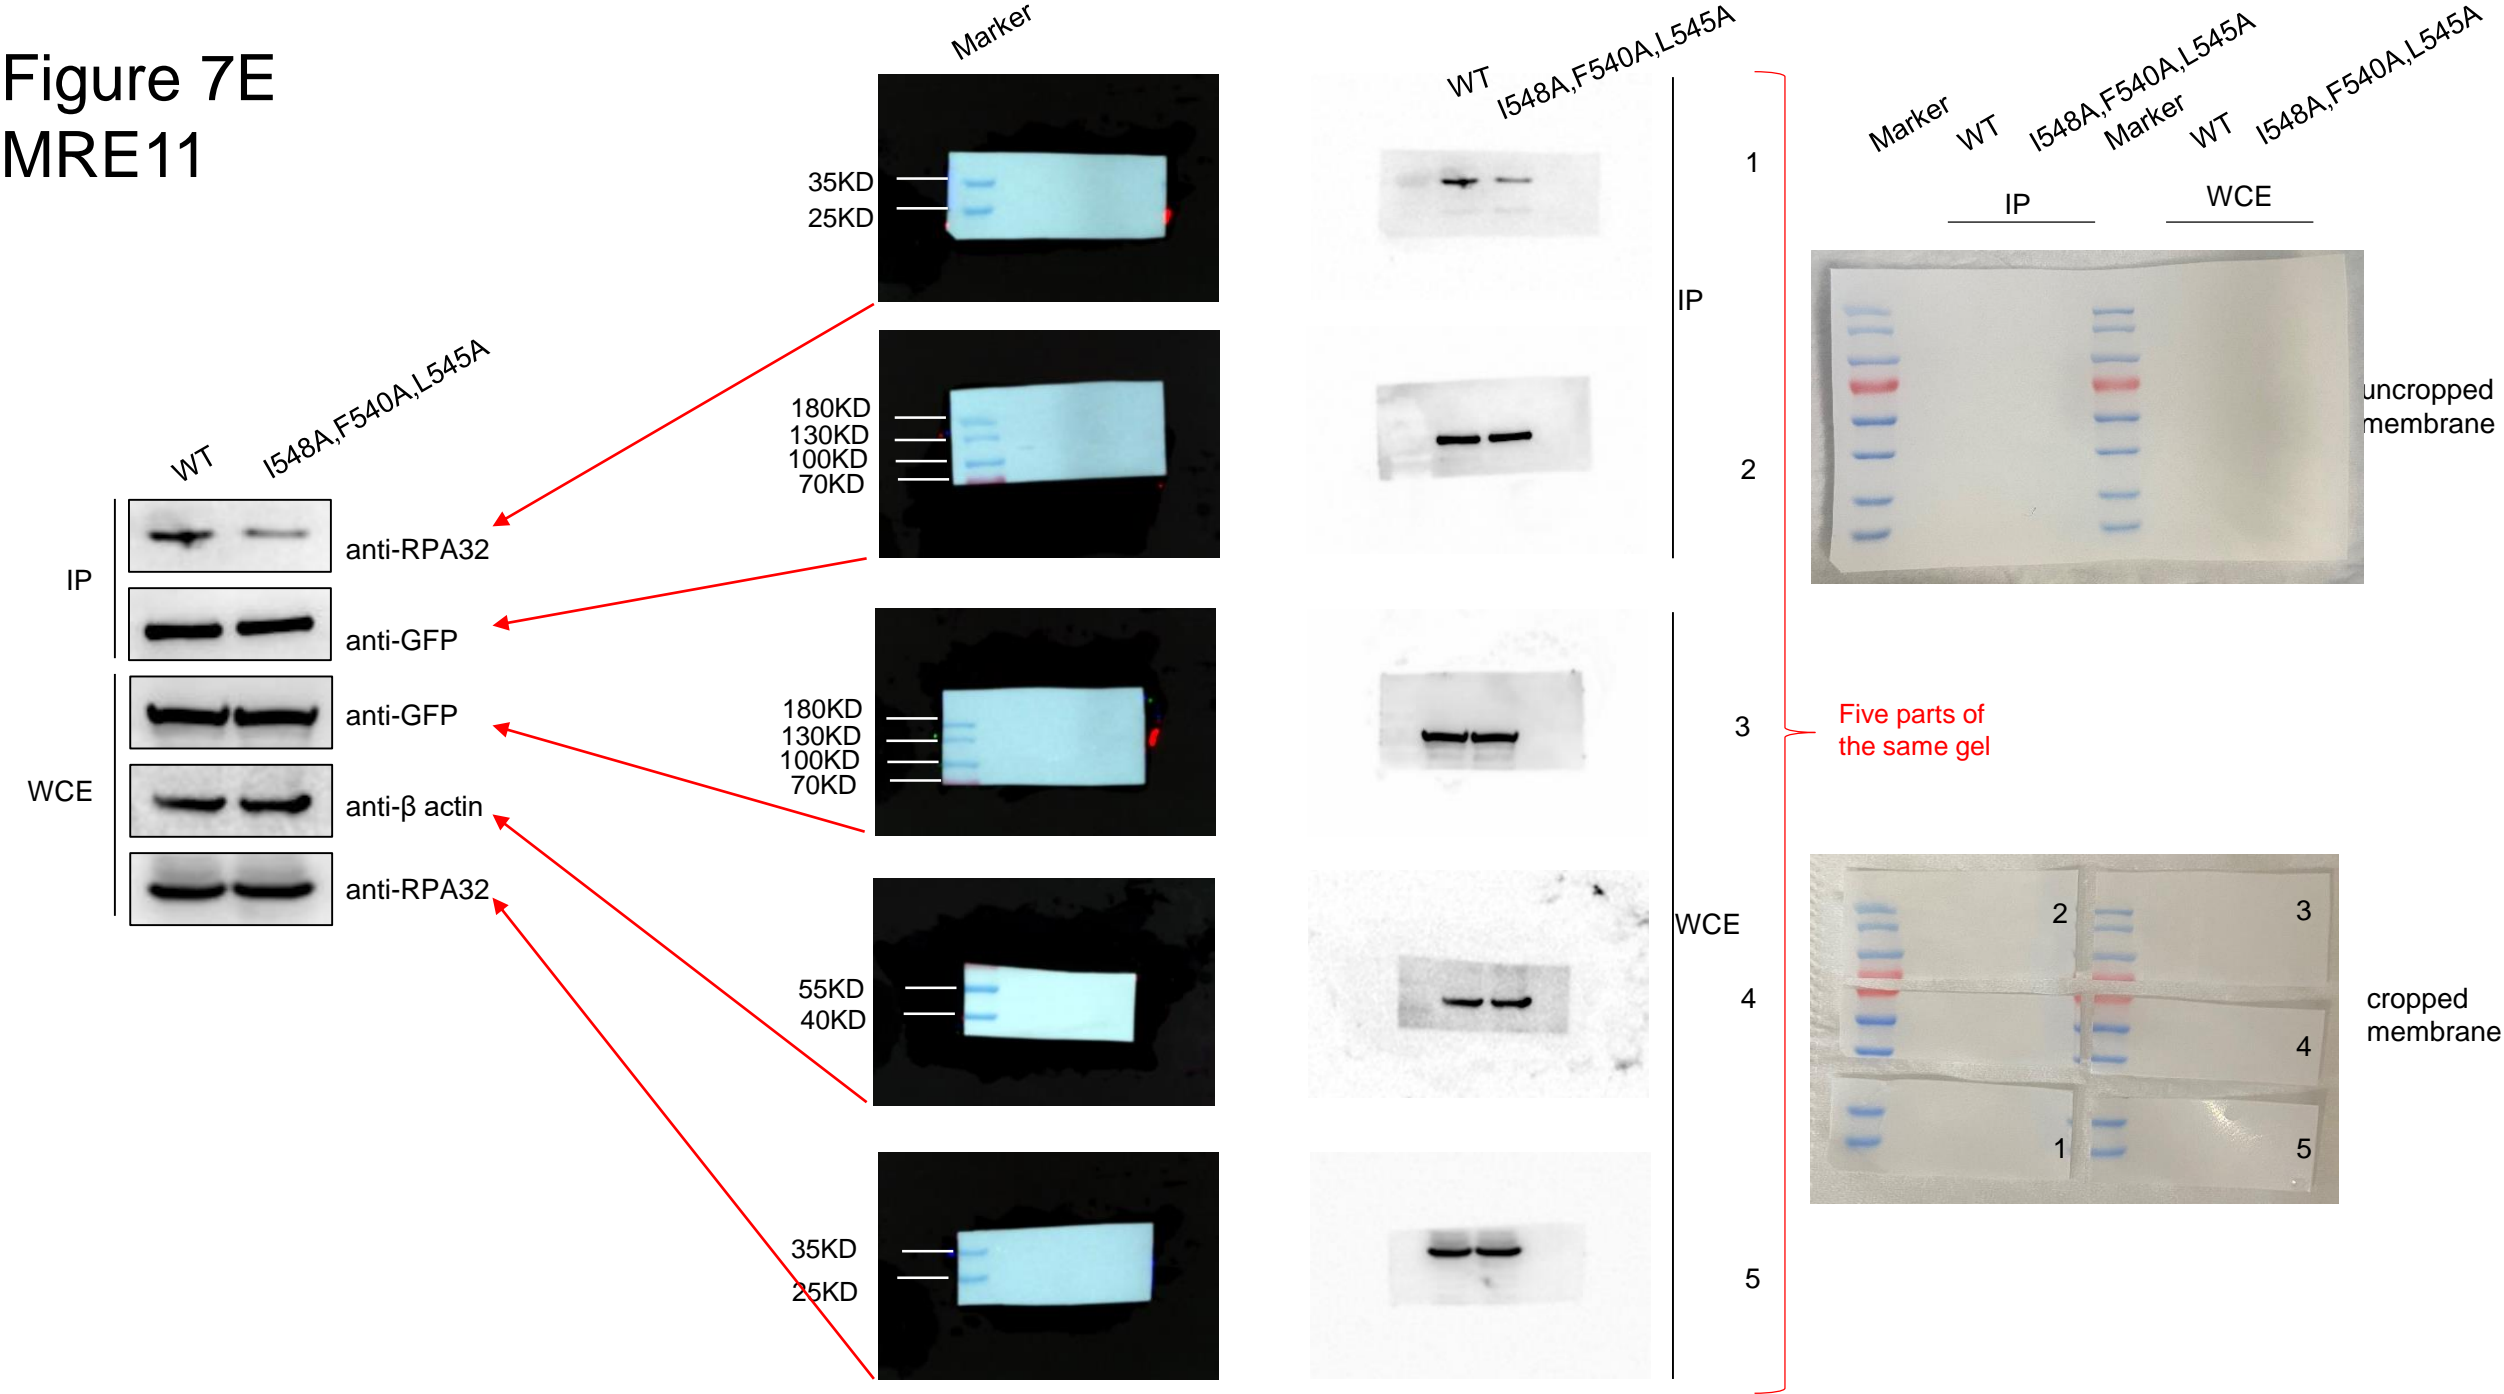

Supplement: fig7-data1 [file Figure 7E.pdf › Figure7-source data/Figure 7E.pdf]

Figure 7E  
MRE11

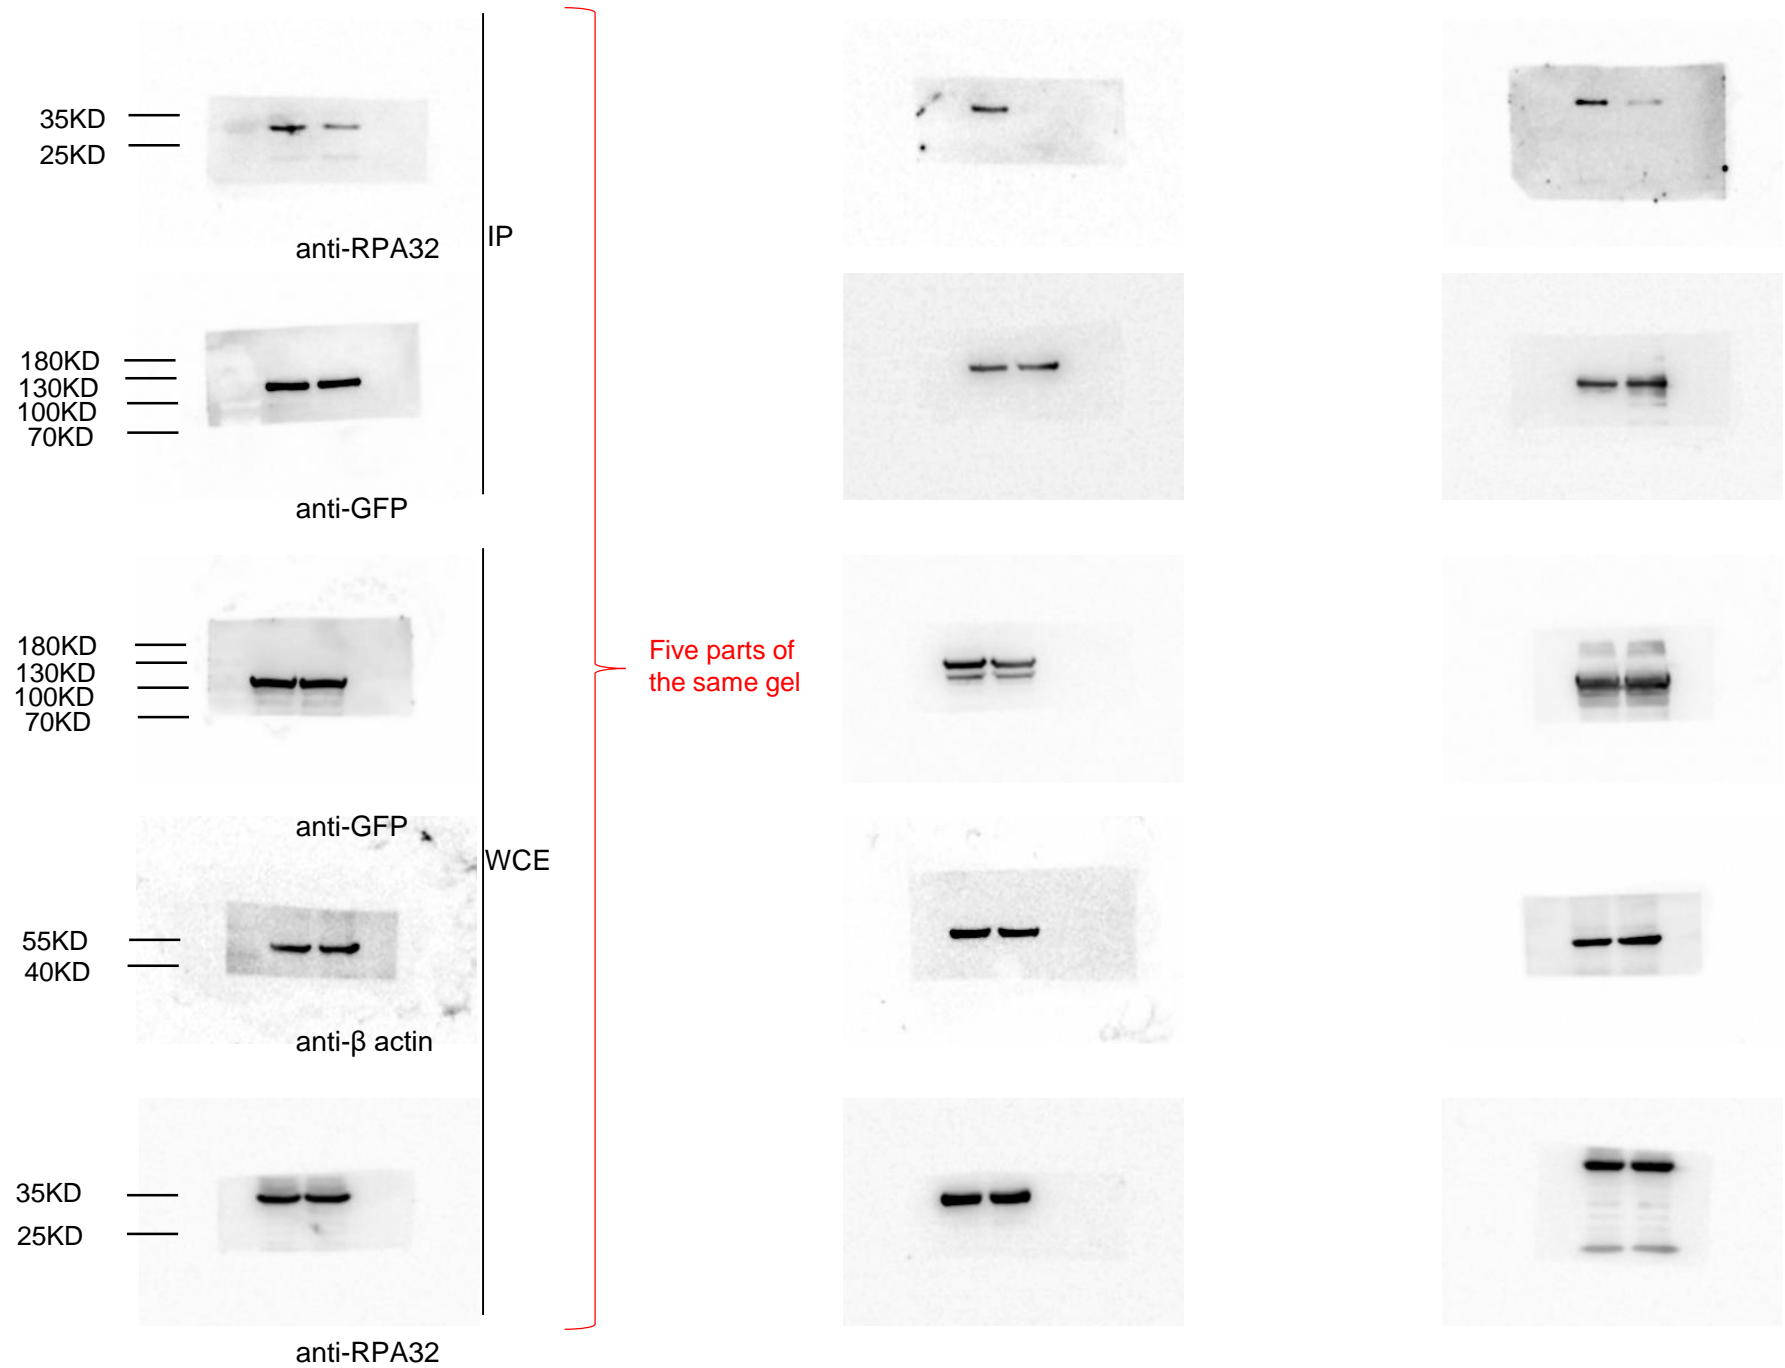

Supplement: fig7-data1 [file IP-data-Figure 7E.pdf › Figure7-source data/IP-data-Figure 7E.pdf]

Figure 8F  
RAD9

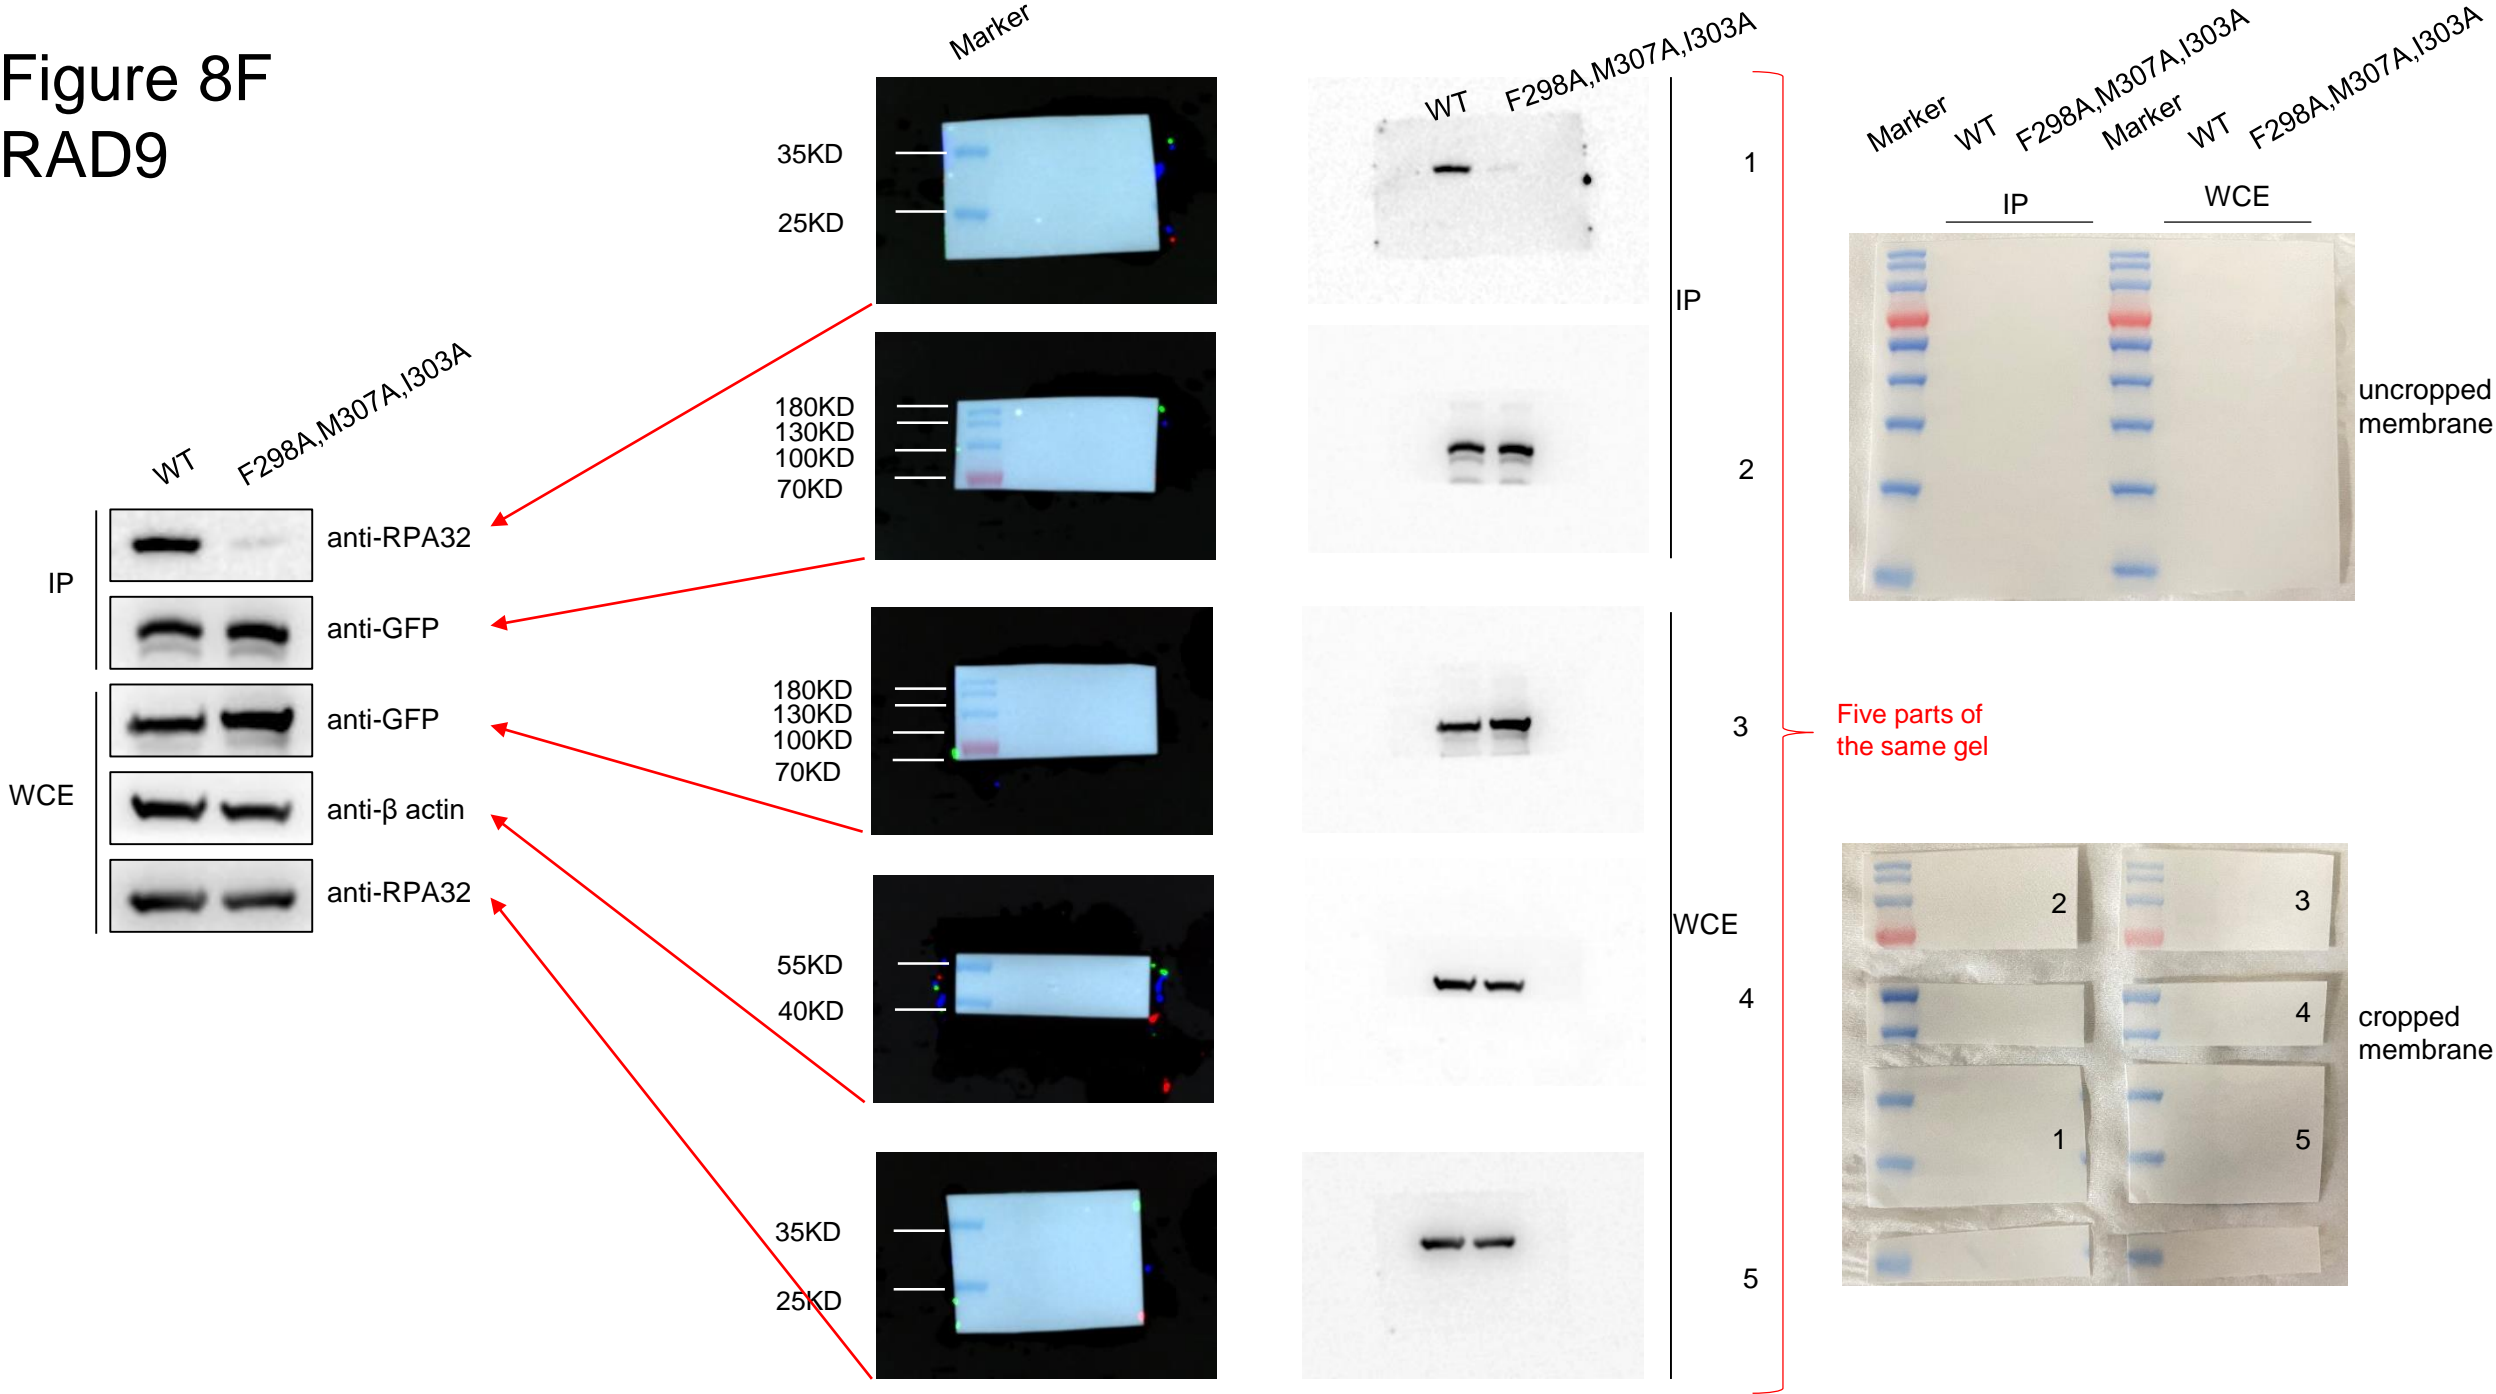

Supplement: fig8-data1 [file Figure 8F.pdf › Figure8-source data/Figure 8F.pdf]

Figure 8F  
RAD9

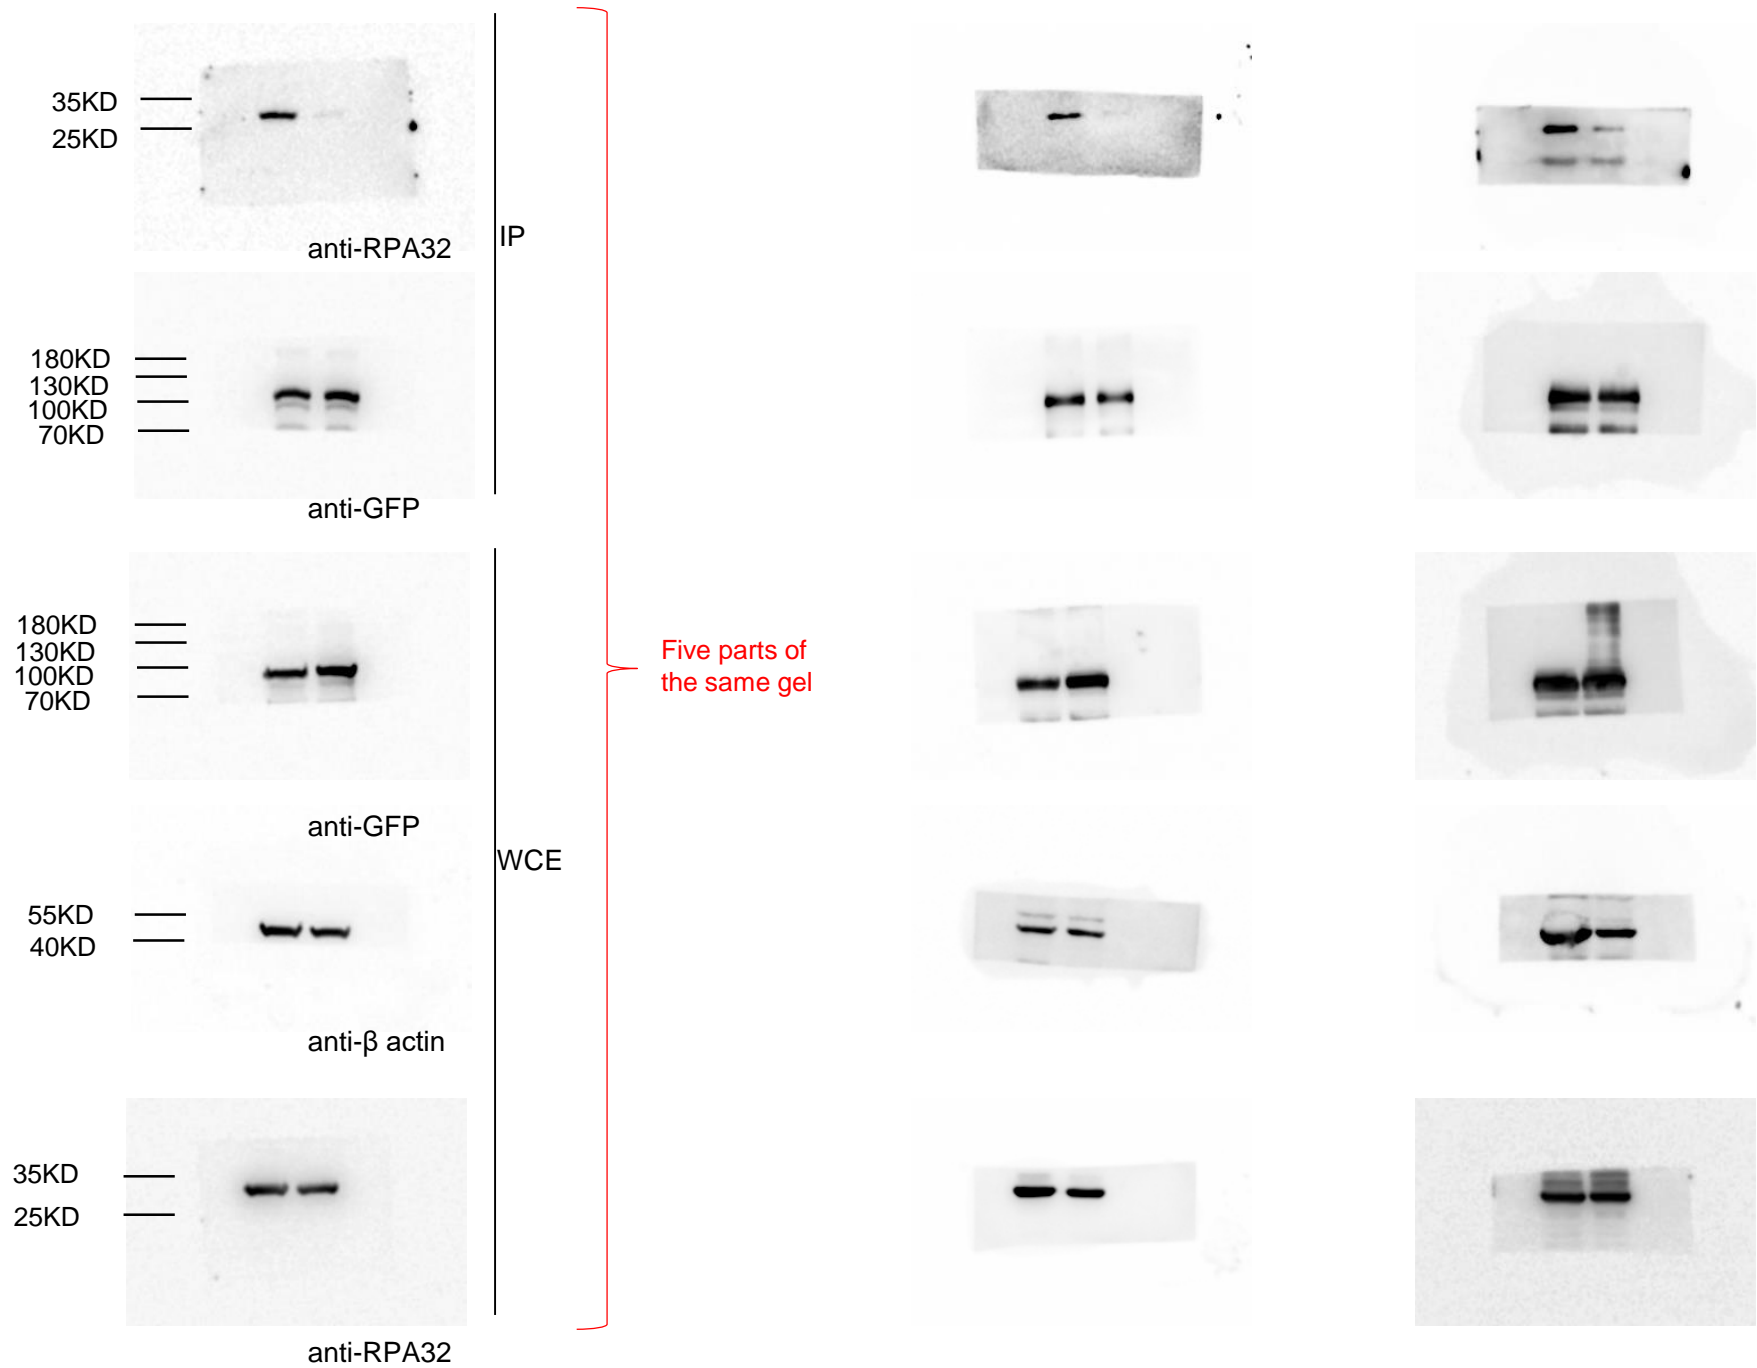

Supplement: fig8-data1 [file IP-data-Figure 8F.pdf › Figure8-source data/IP-data-Figure 8F.pdf]

Figure 9H  
ETAA1

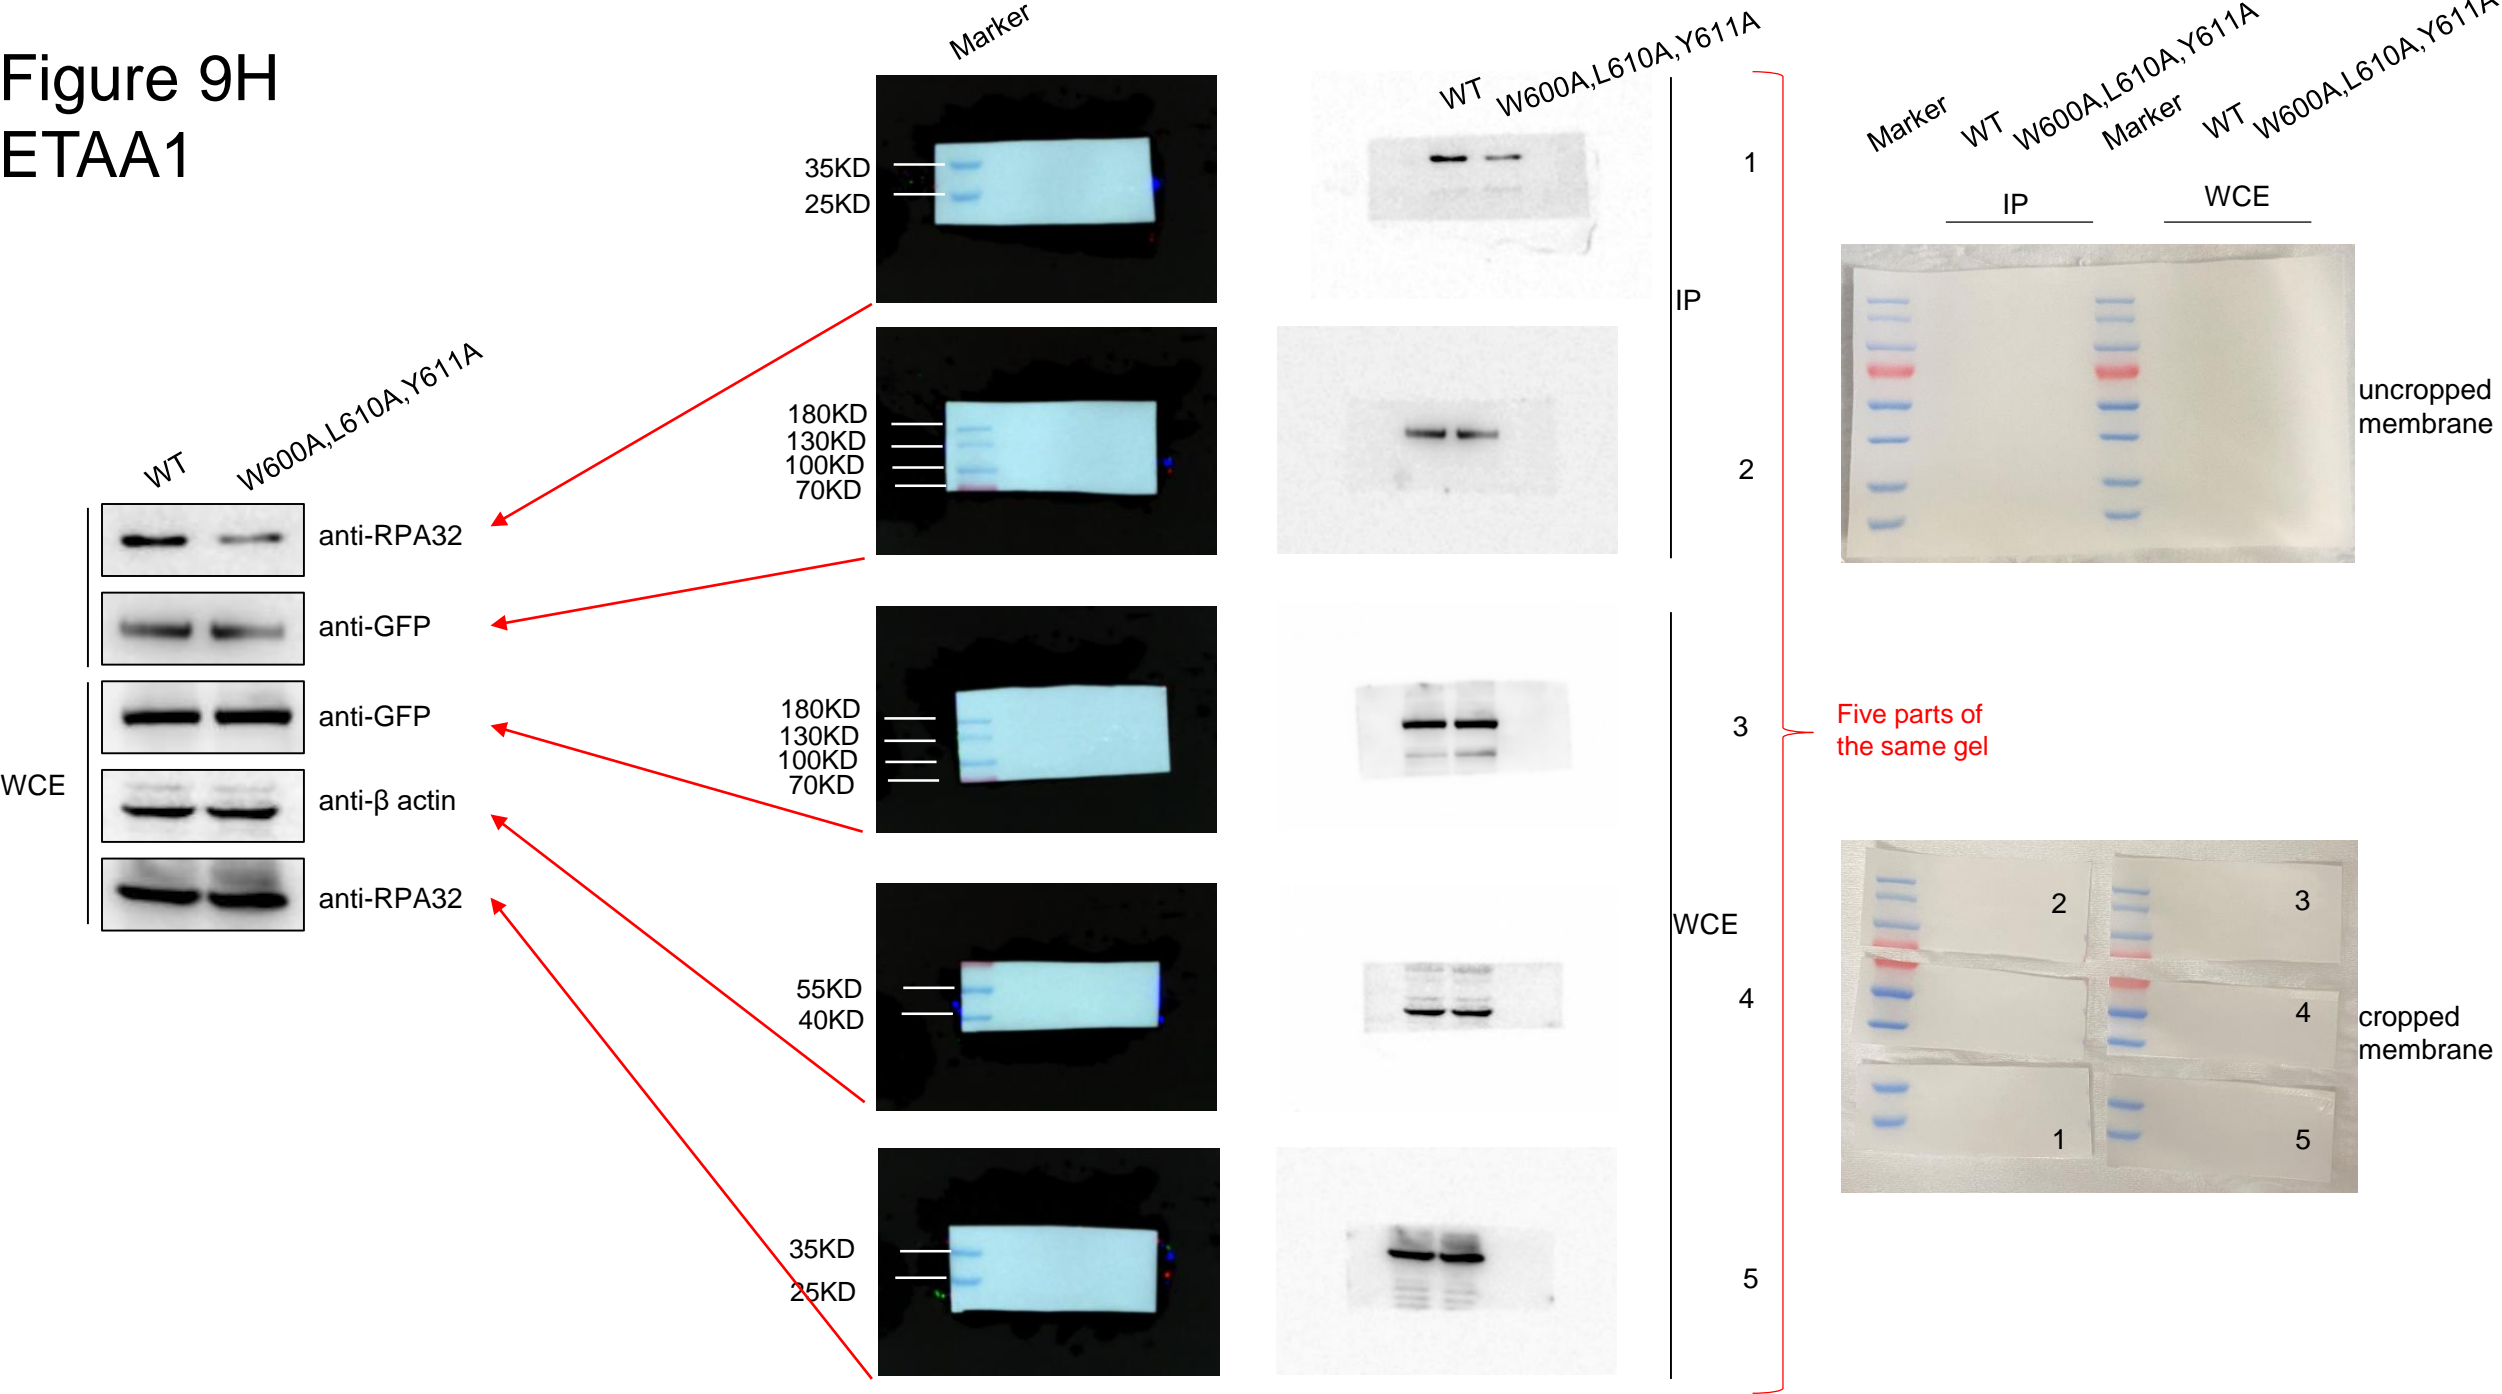

Supplement: fig9-data1 [file Figure 9H.pdf › Figure9-source data/Figure 9H.pdf]

Figure 9H  
ETAA1

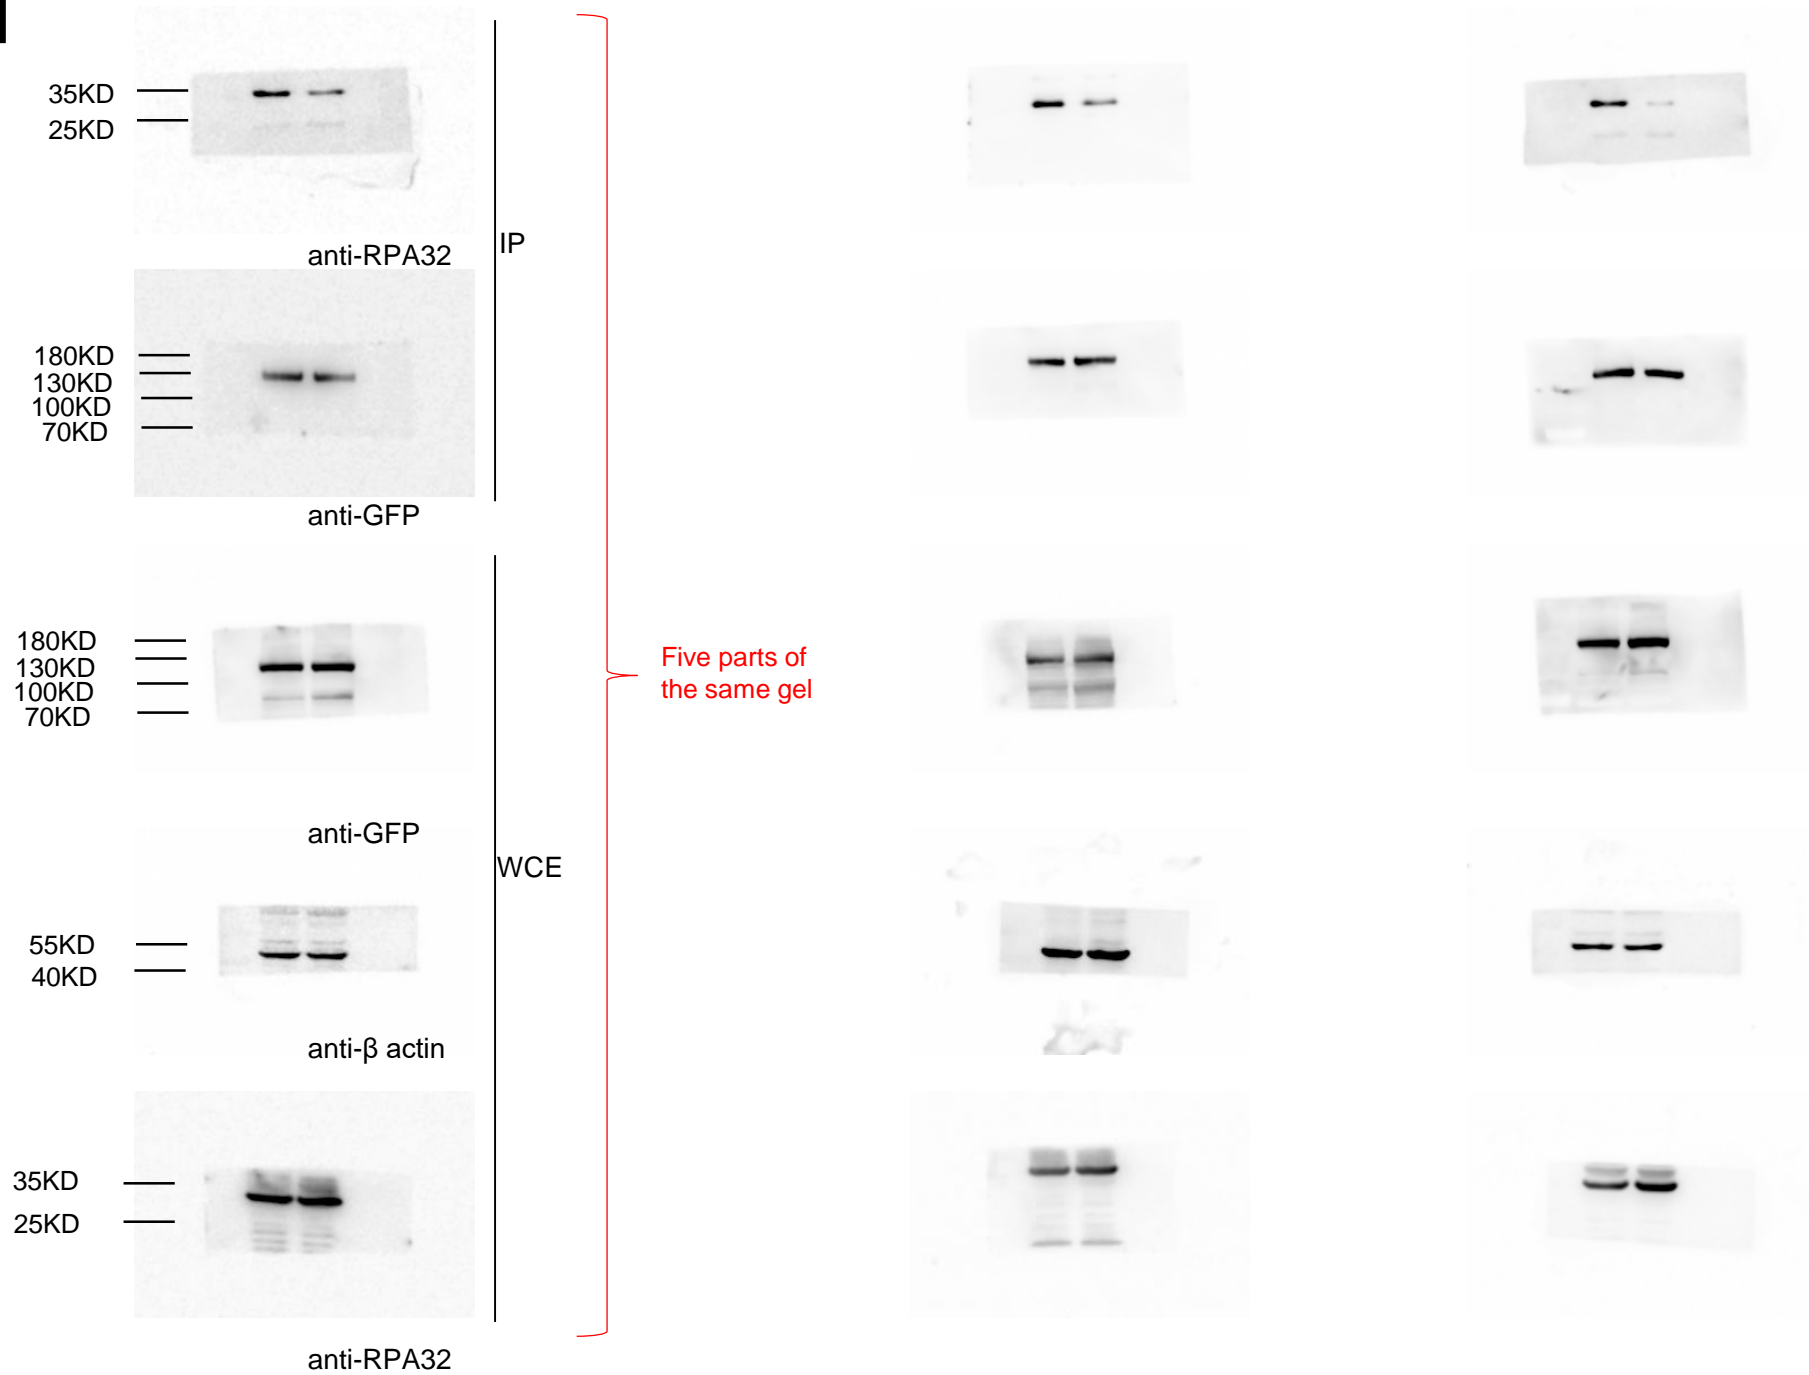

Supplement: fig9-data1 [file IP-data-Figure 9H.pdf › Figure9-source data/IP-data-Figure 9H.pdf]
